# Supplementary figures and images for: What Does “ITS” Say About Hybridization in Lineages of Sarsia (Corynidae, Hydrozoa) from the White Sea?
Source: Preprints.org preprint supplement (doi:10.20944/preprints202304.0985.v1), 2023-04-26

Fig. S1 Photographs of collected specimens (see Table S1). Scale Bar 1 mm.

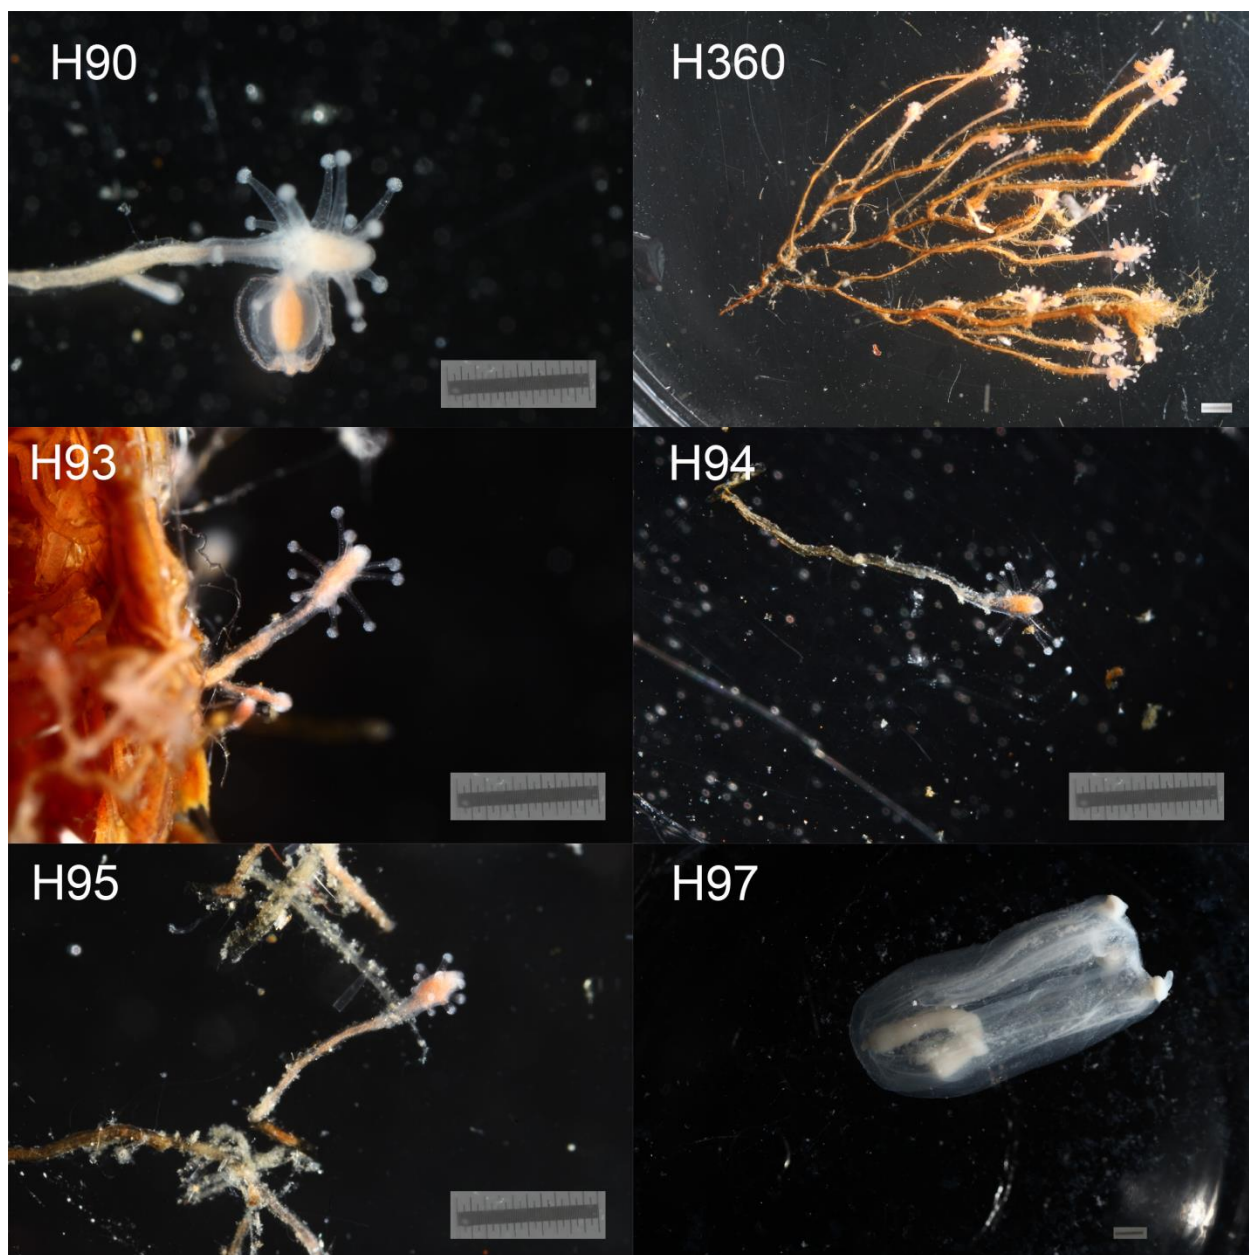

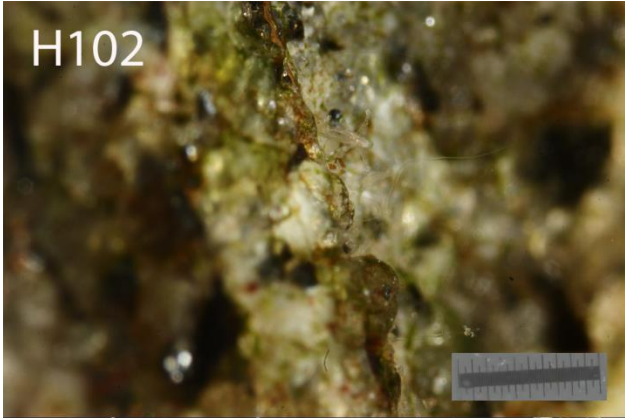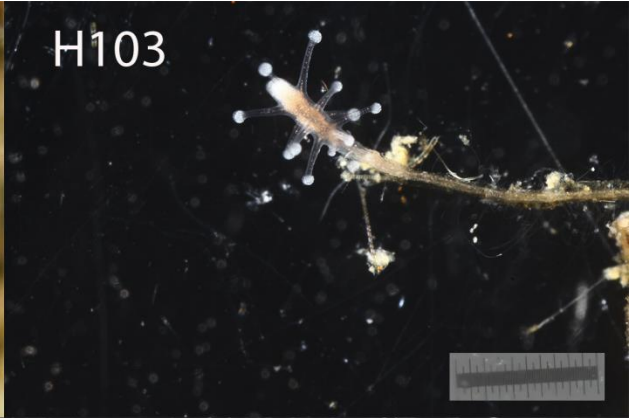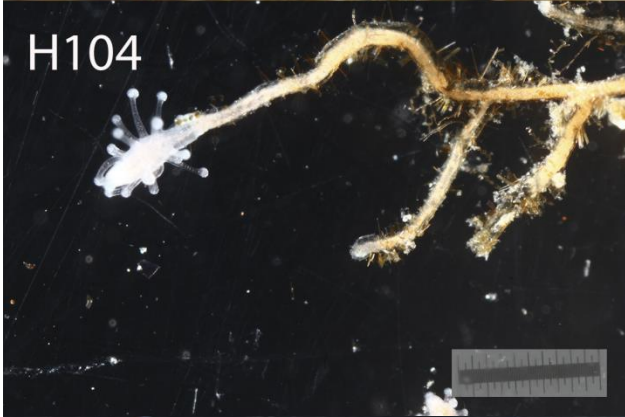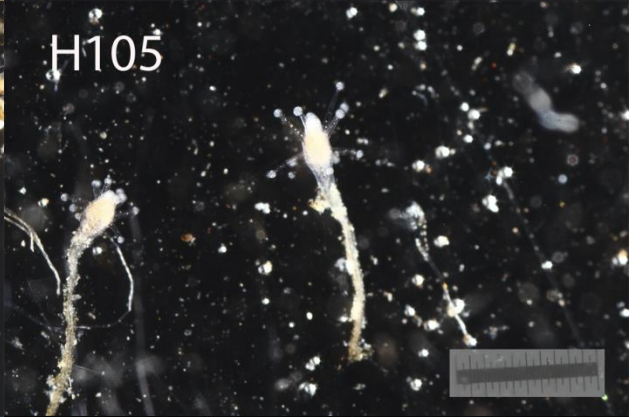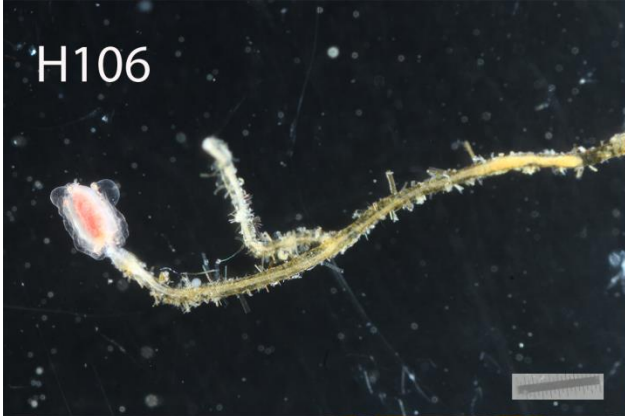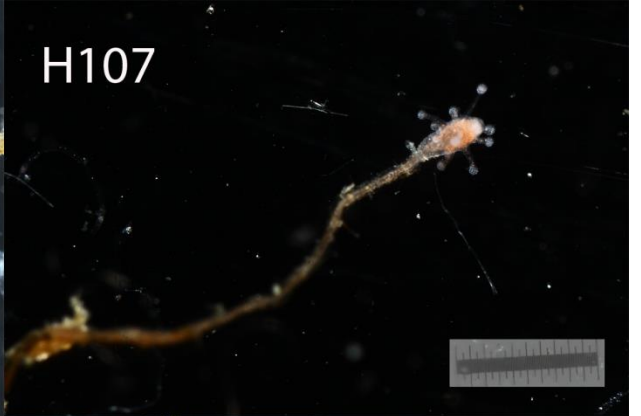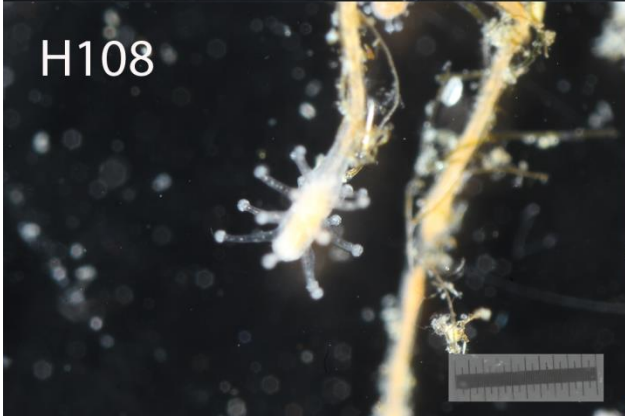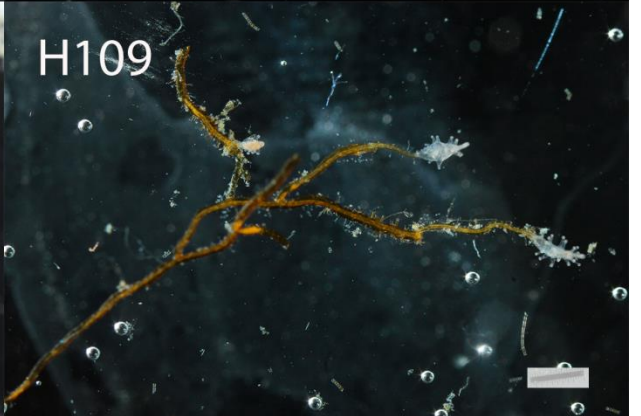

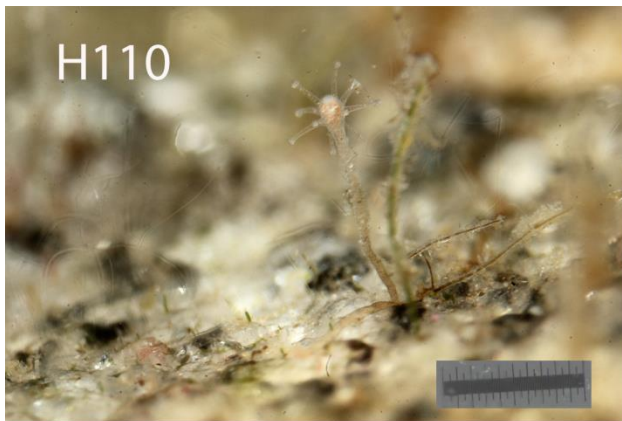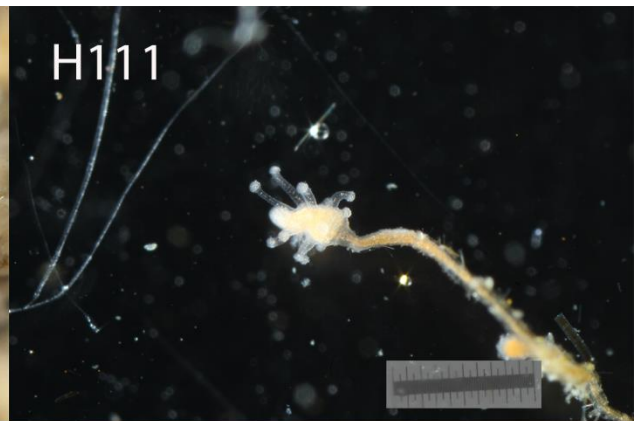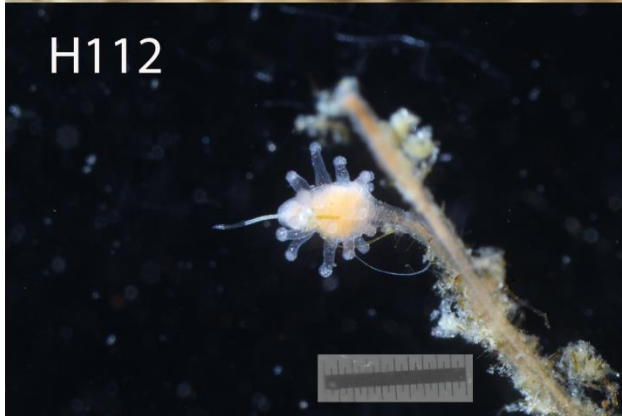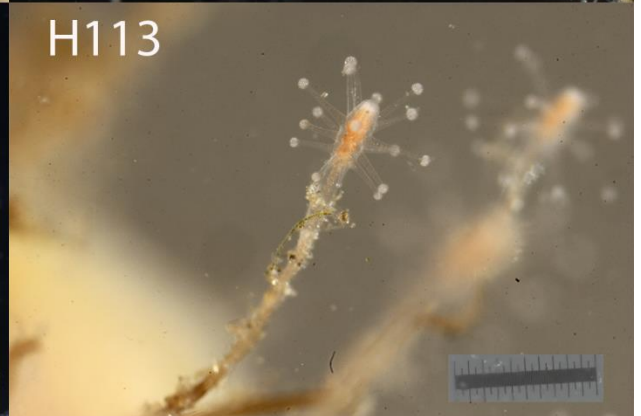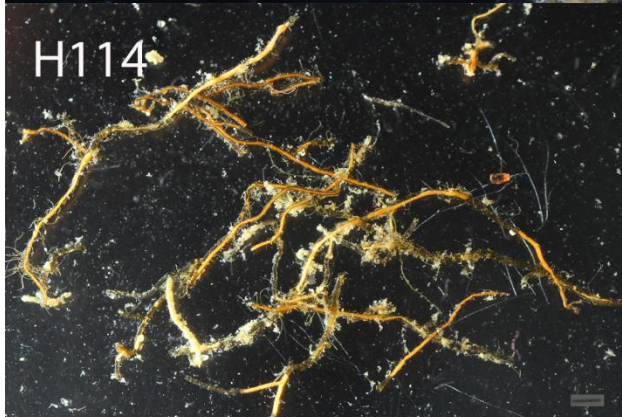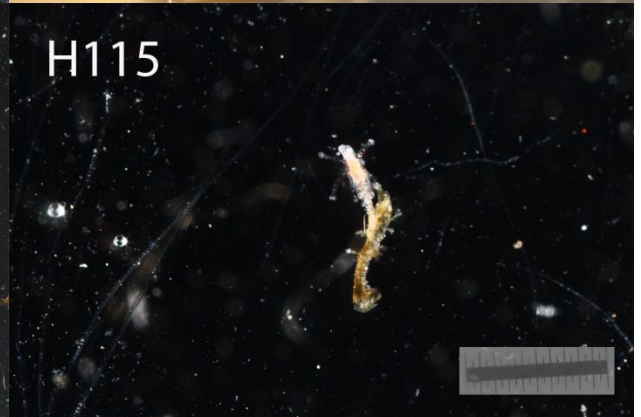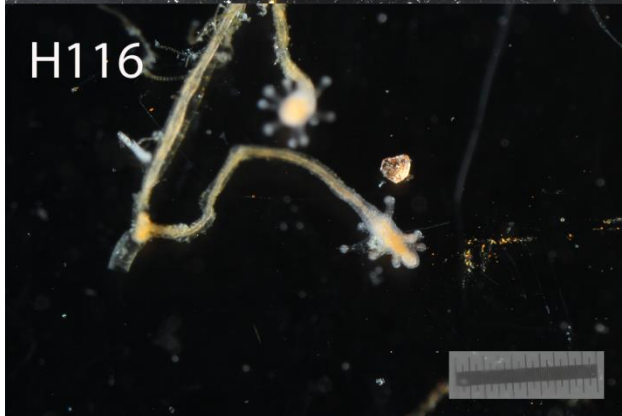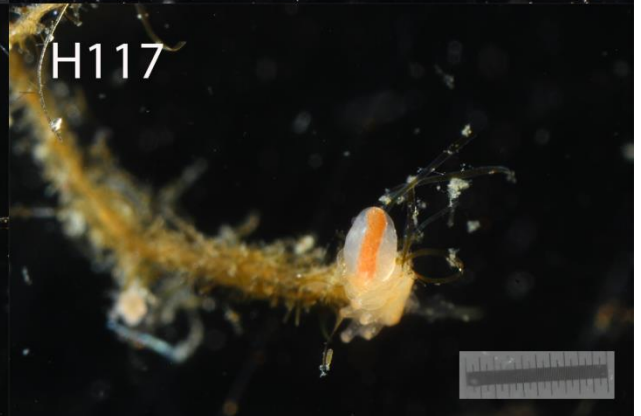

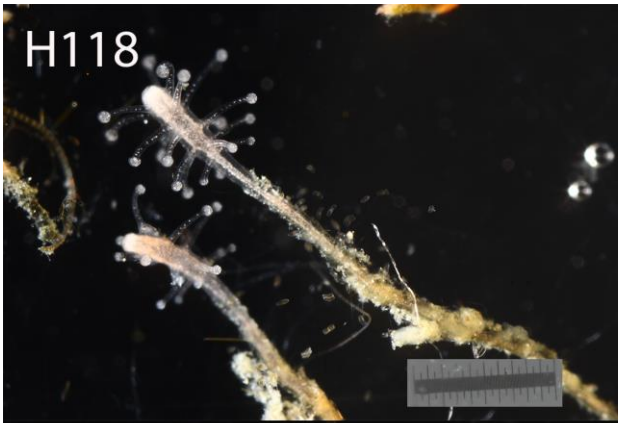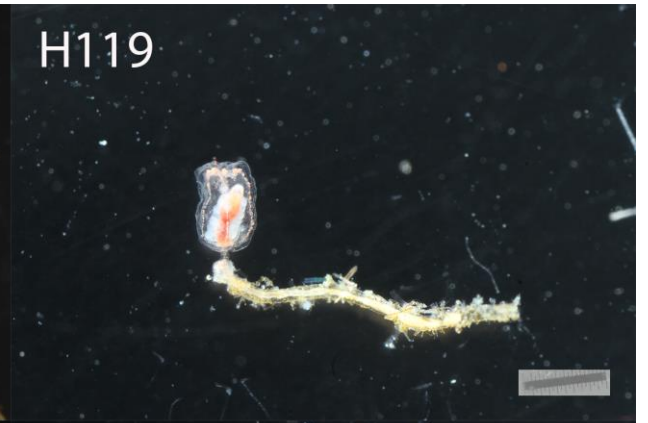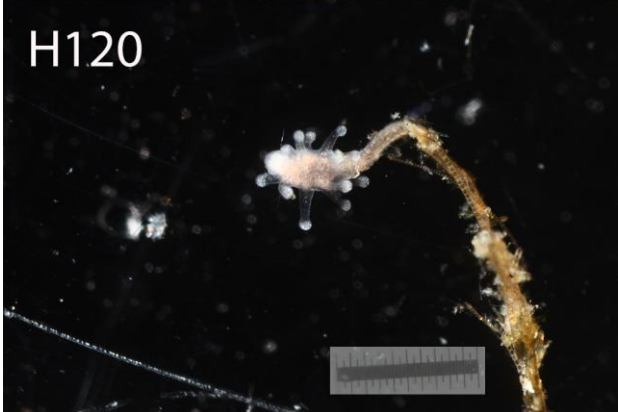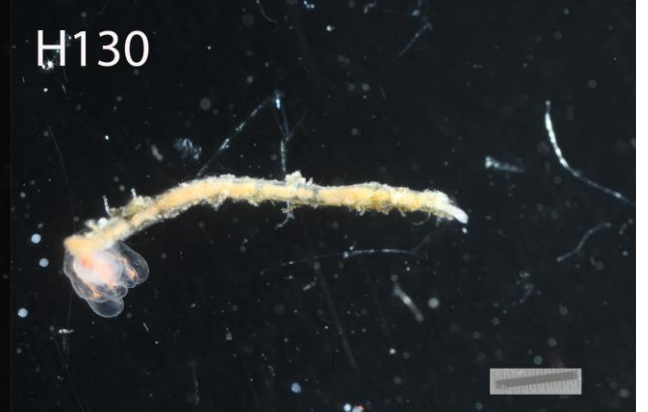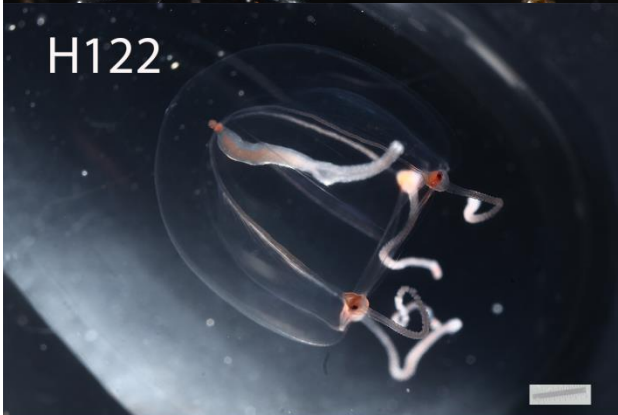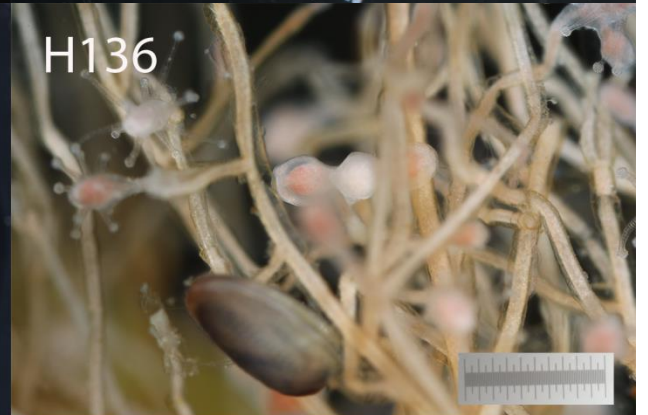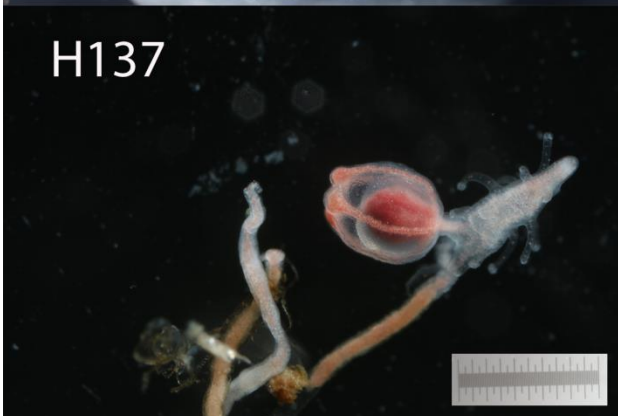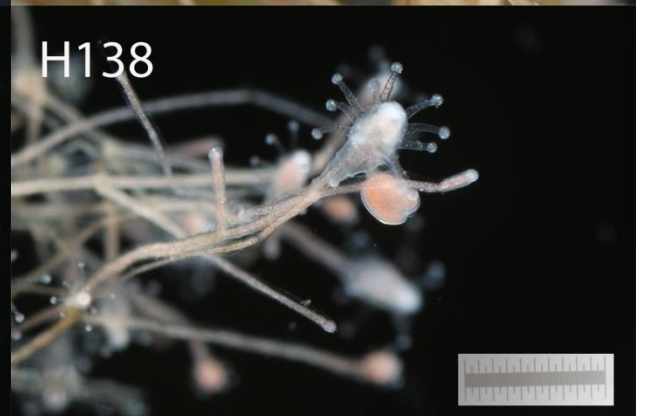

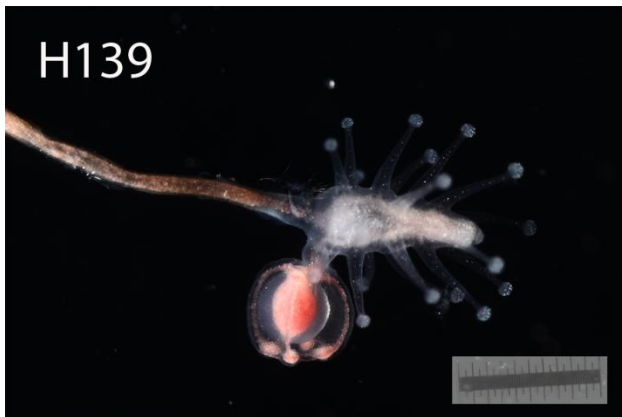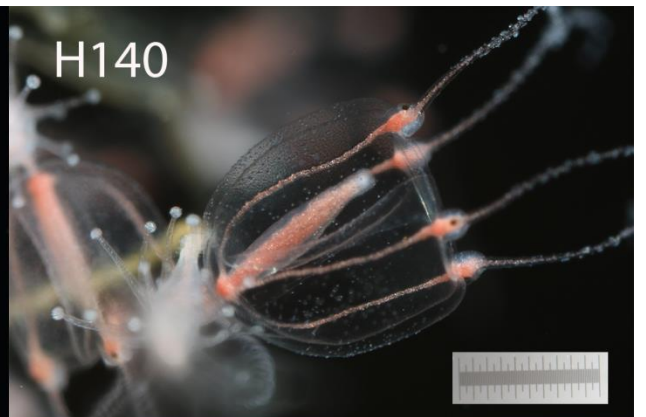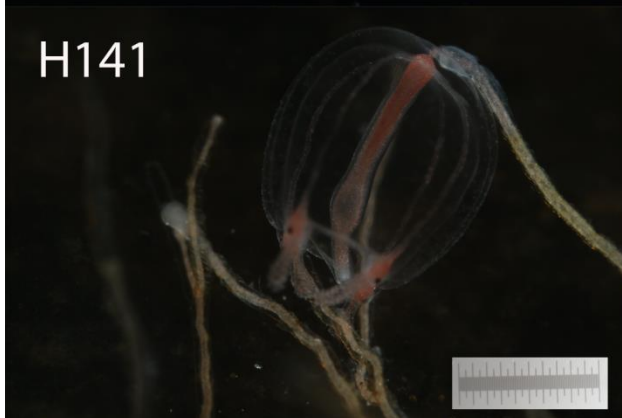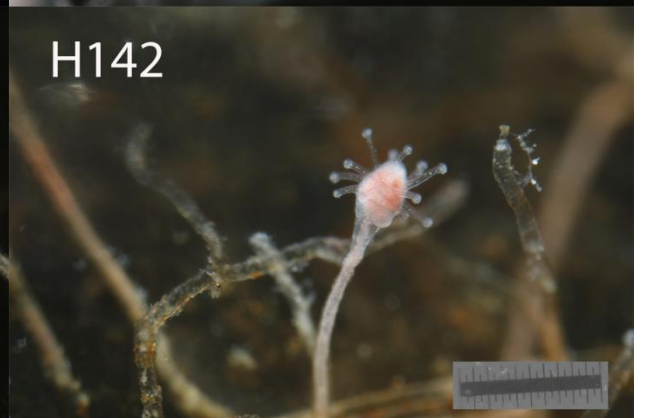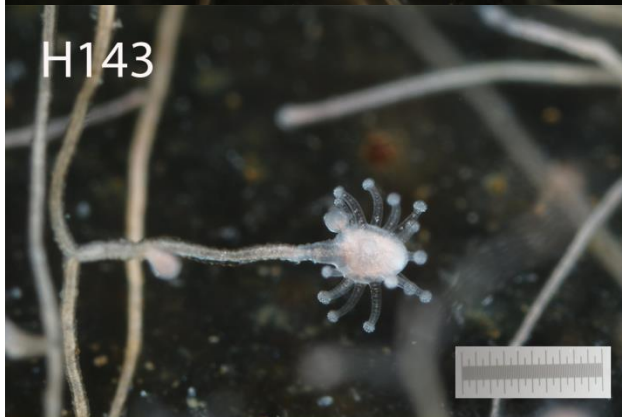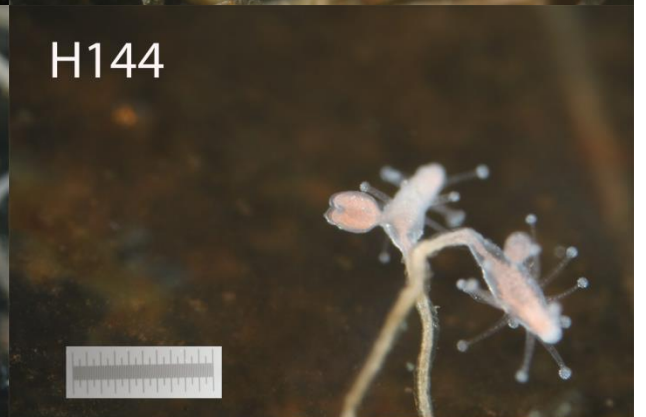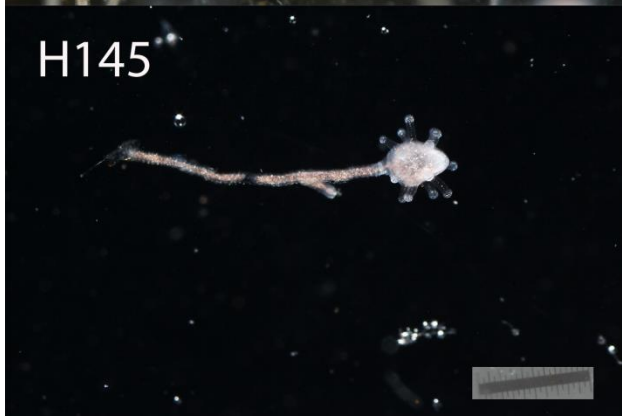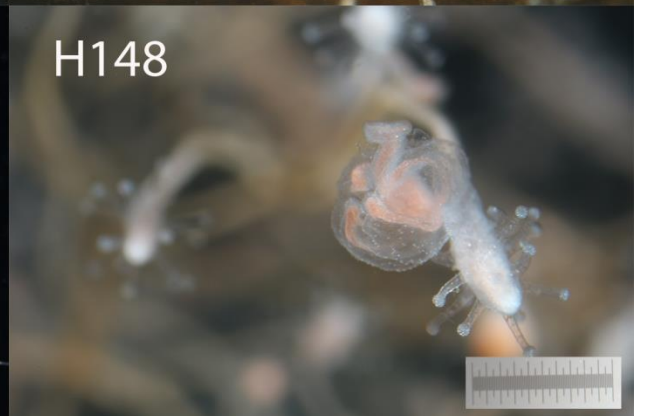

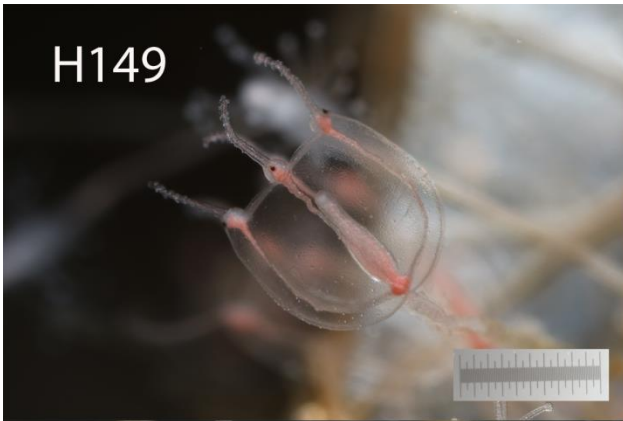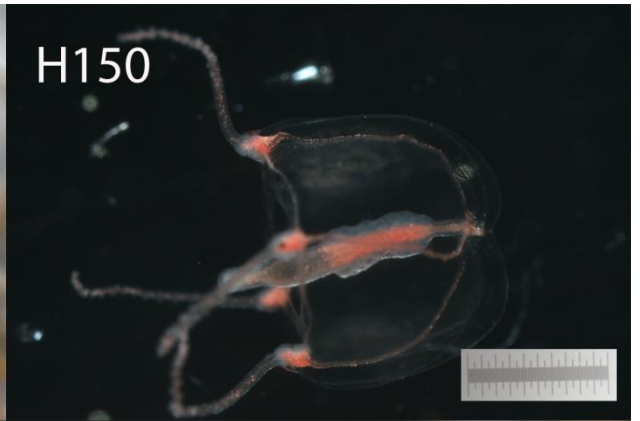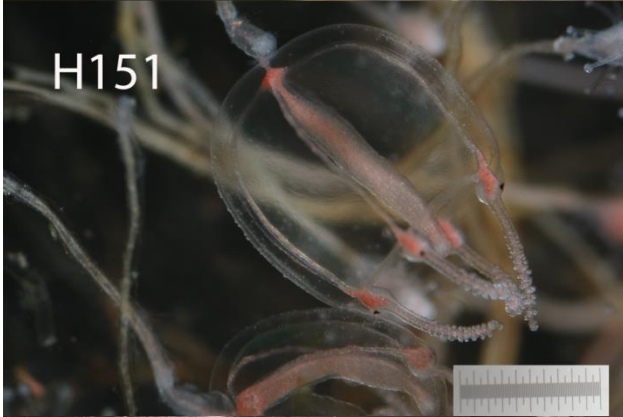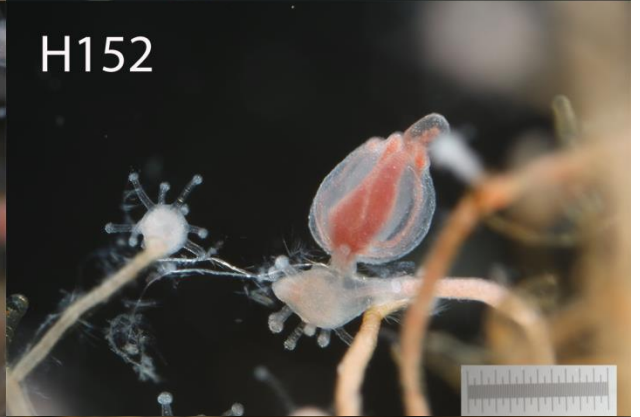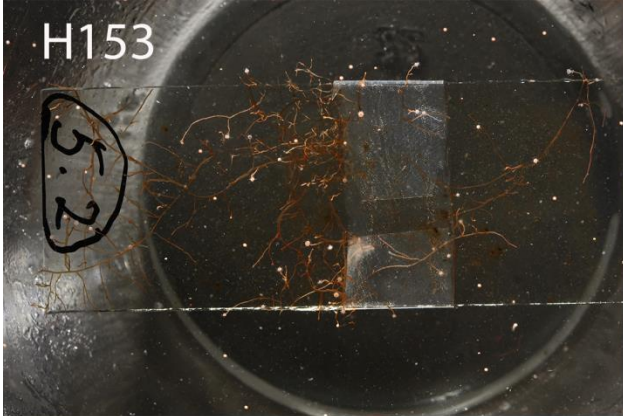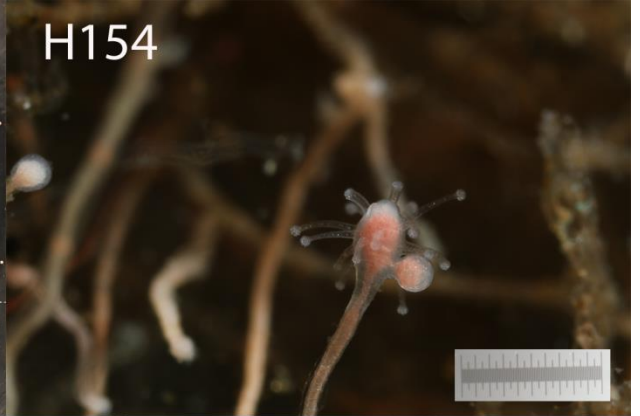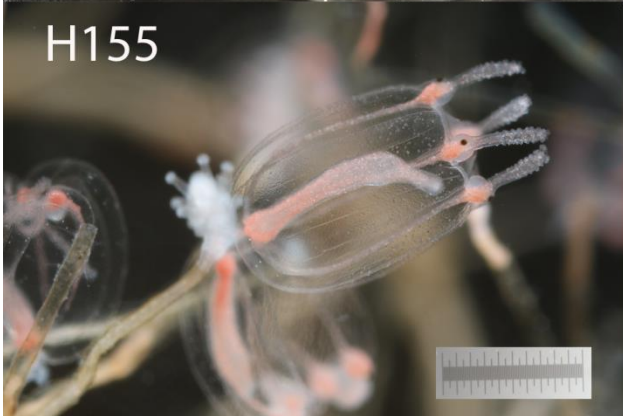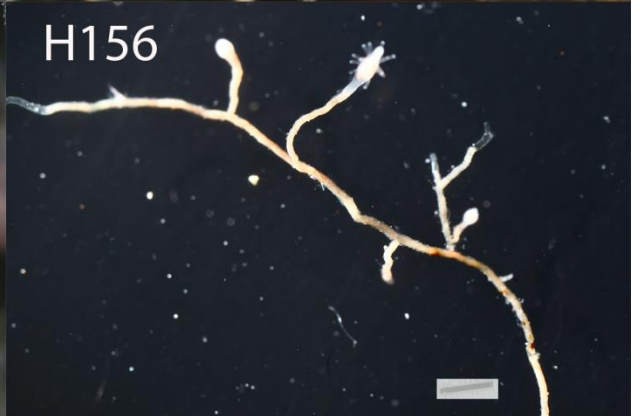

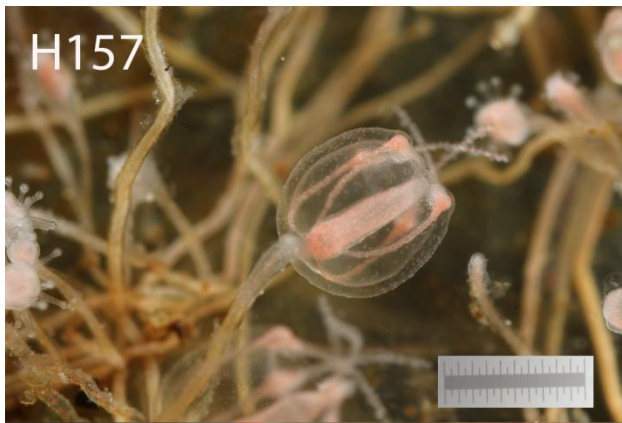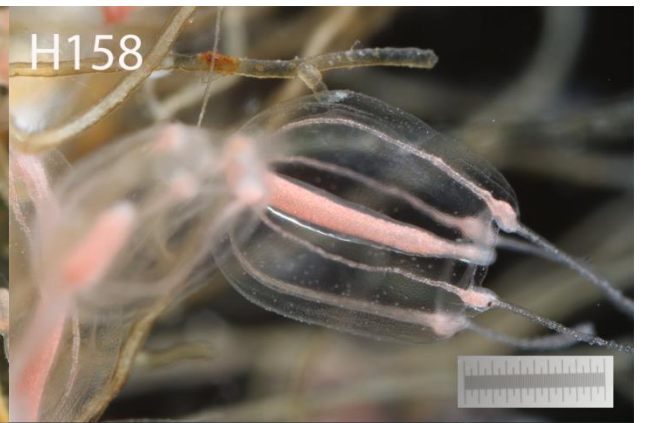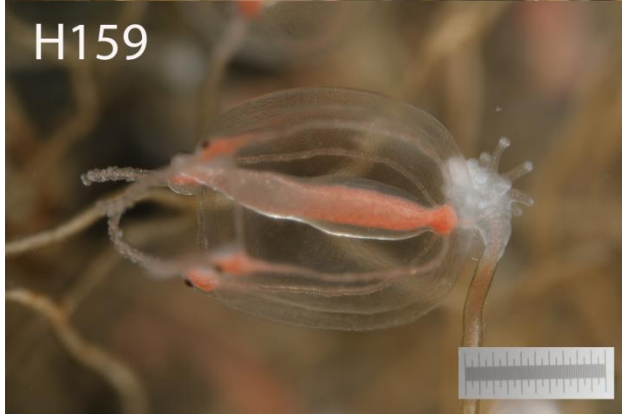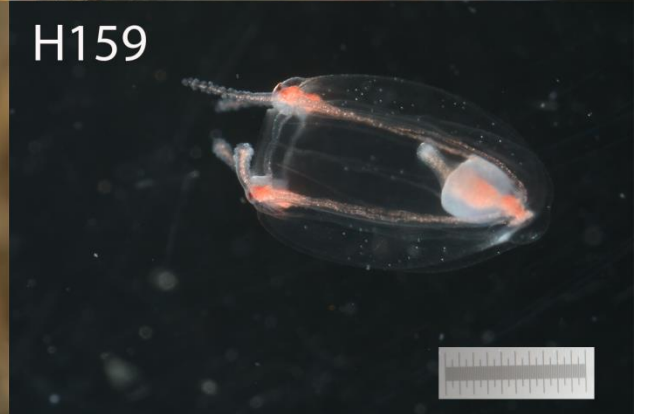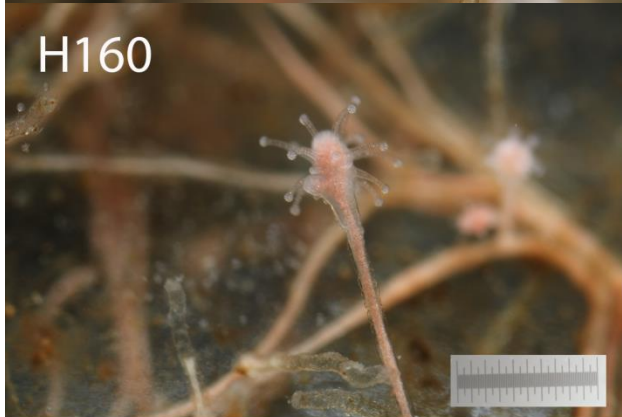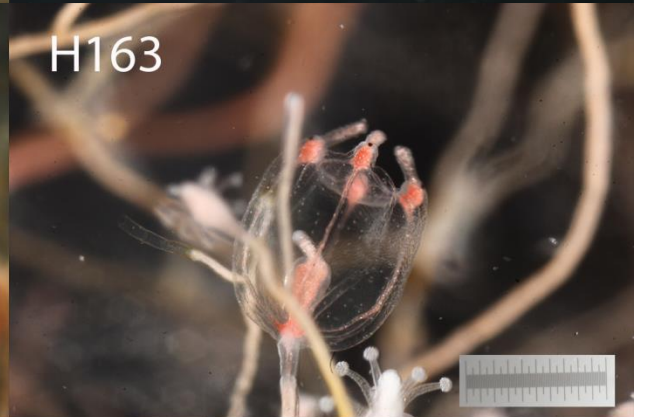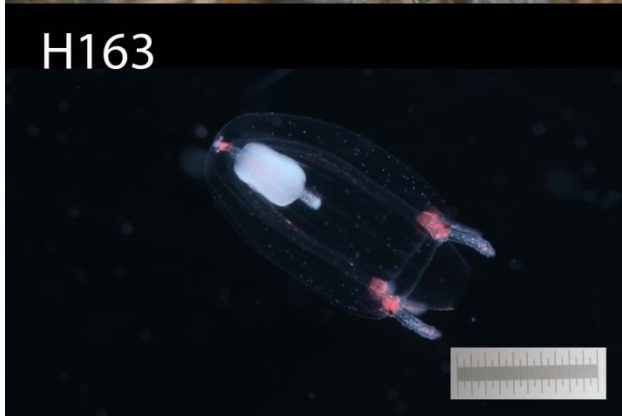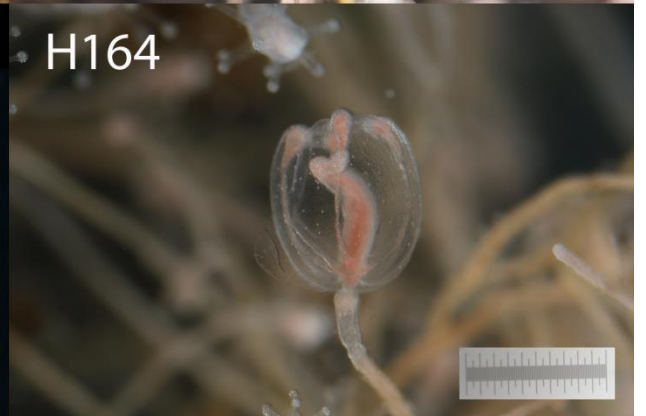

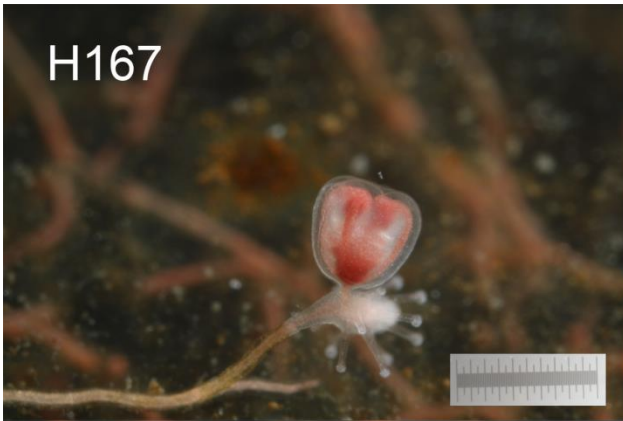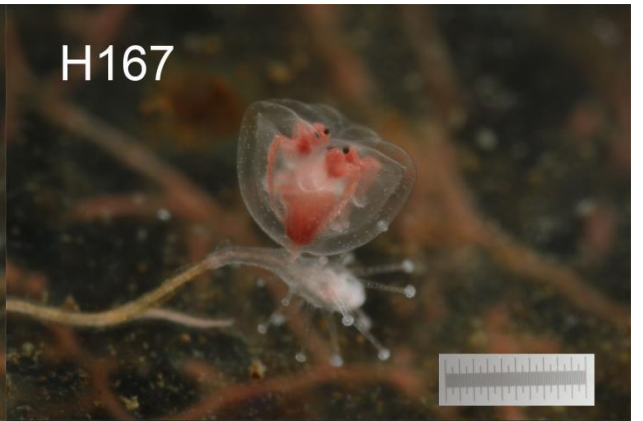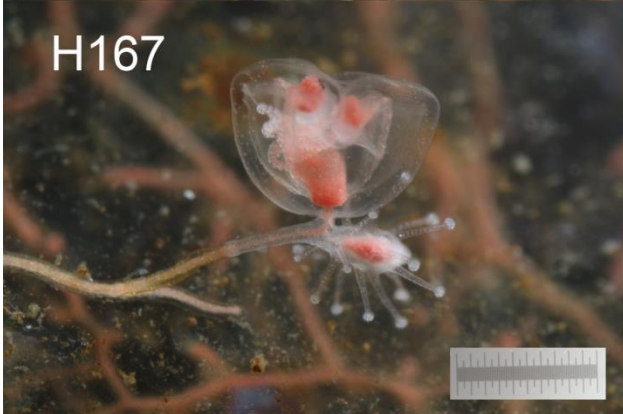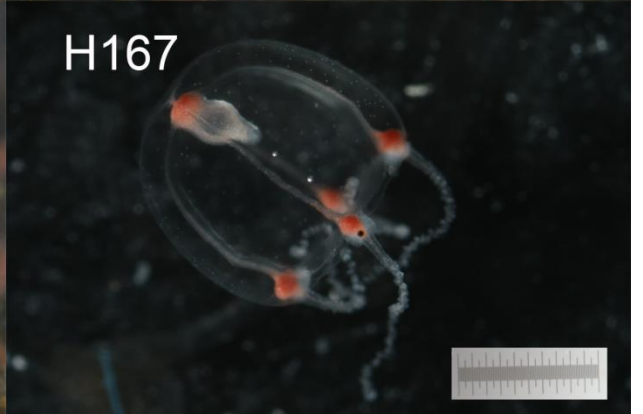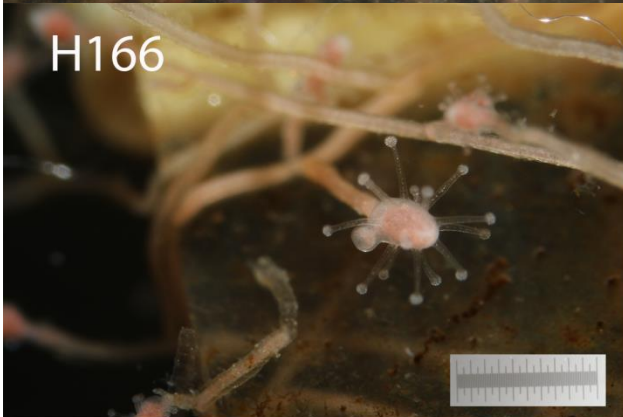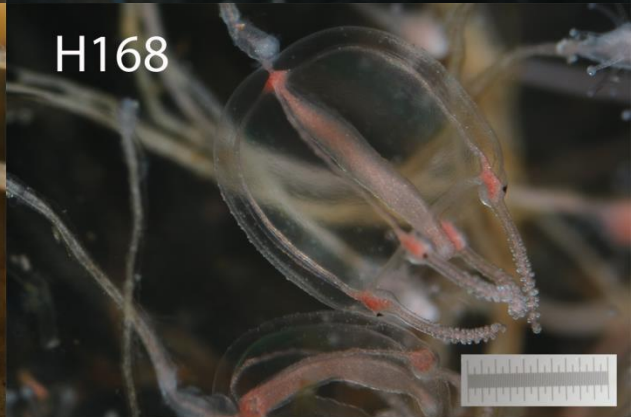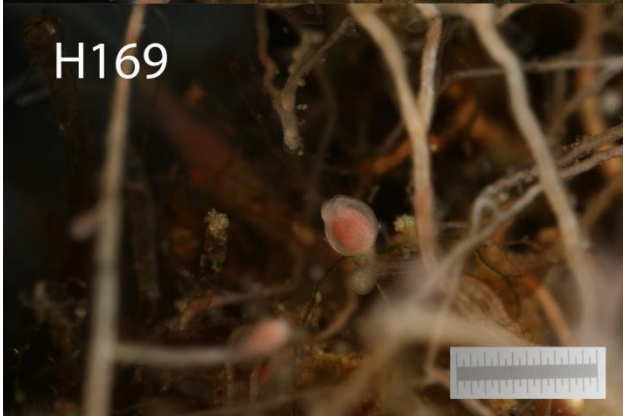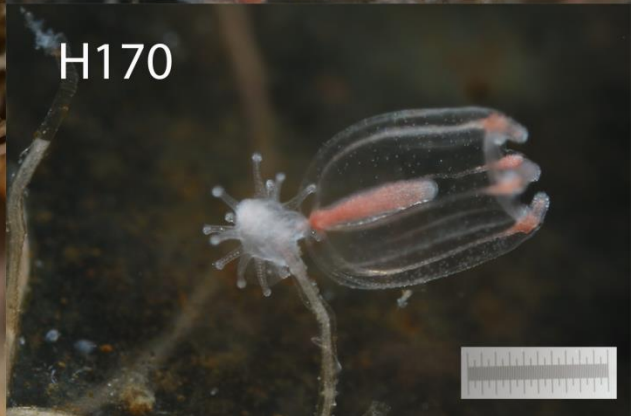

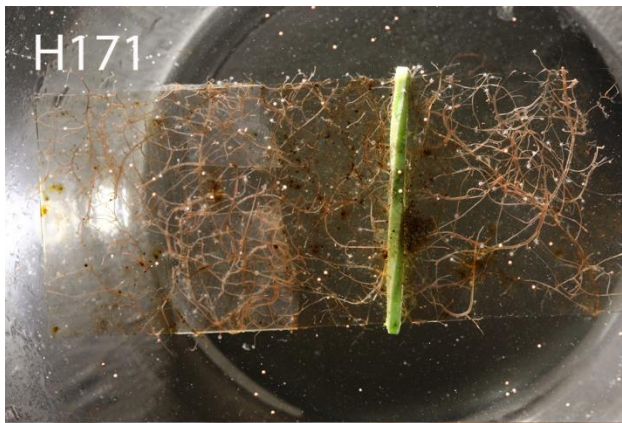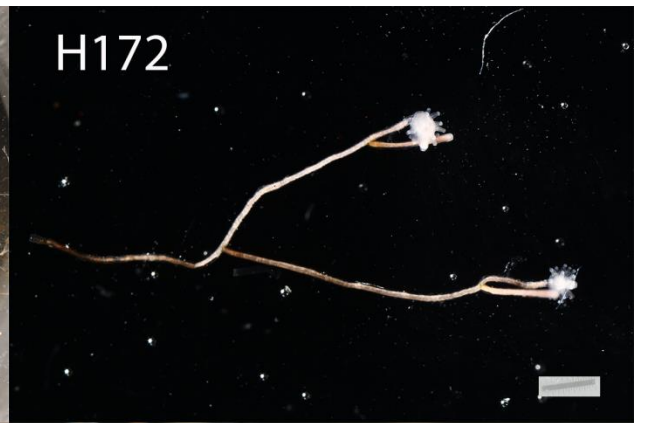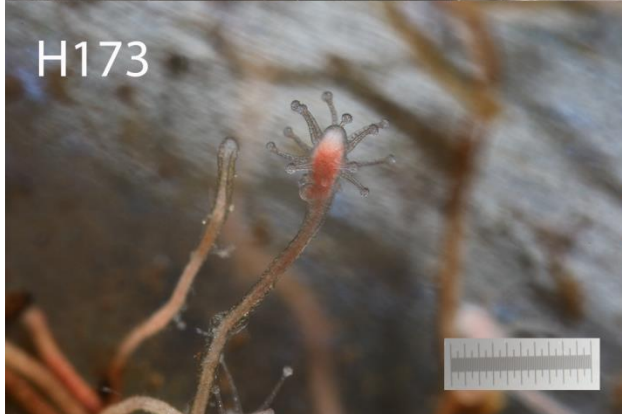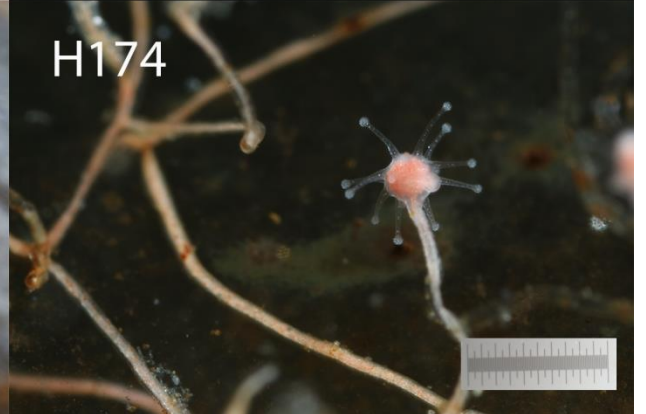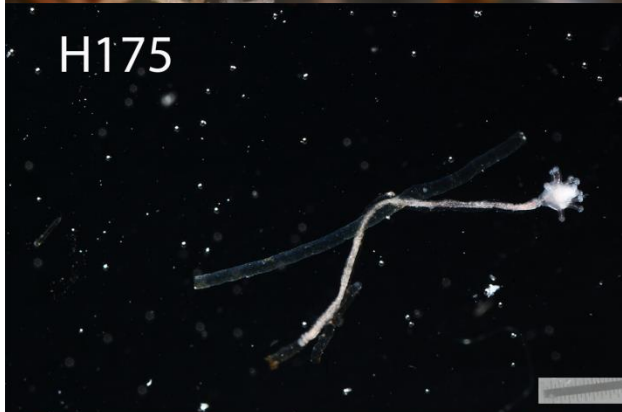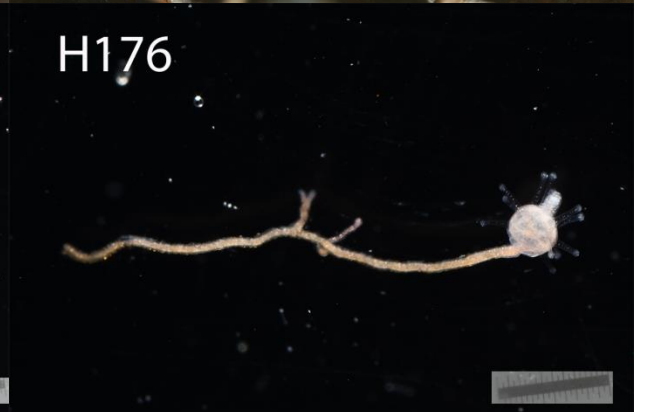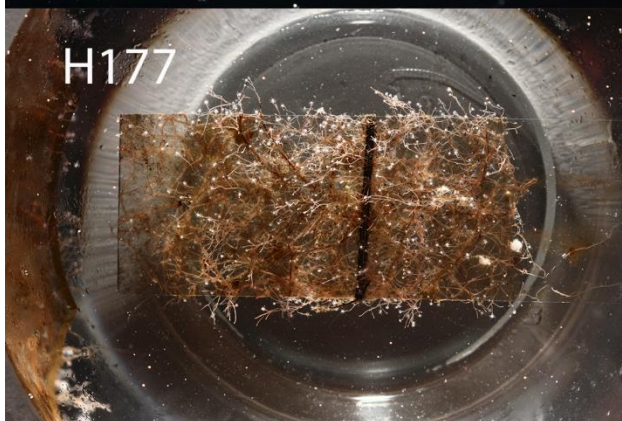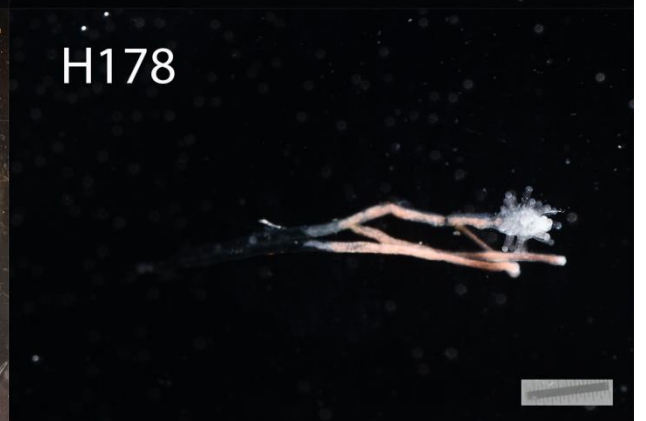

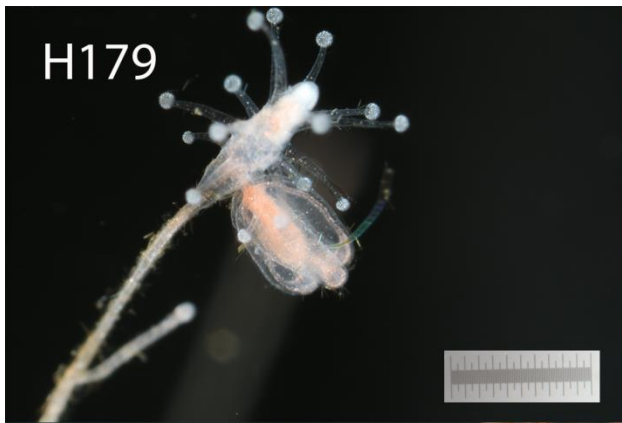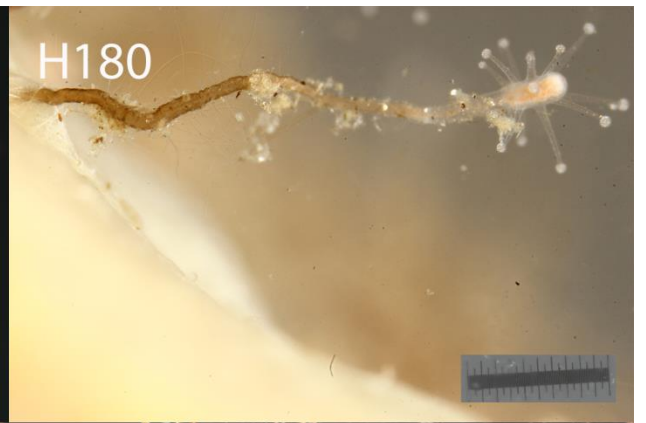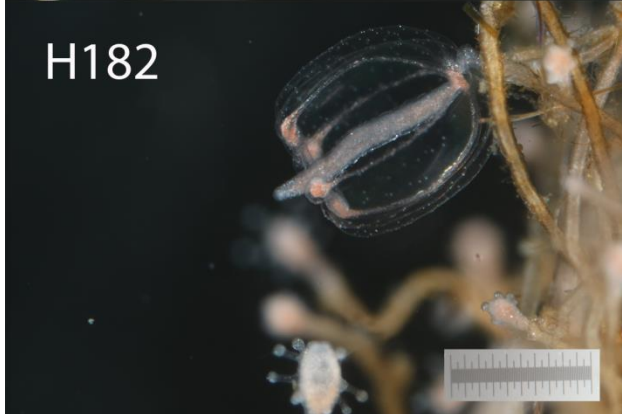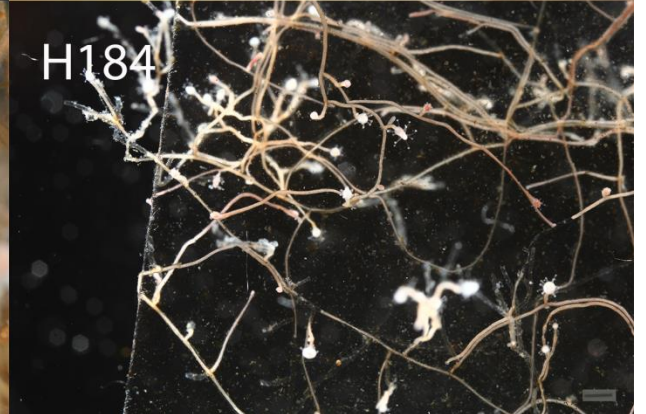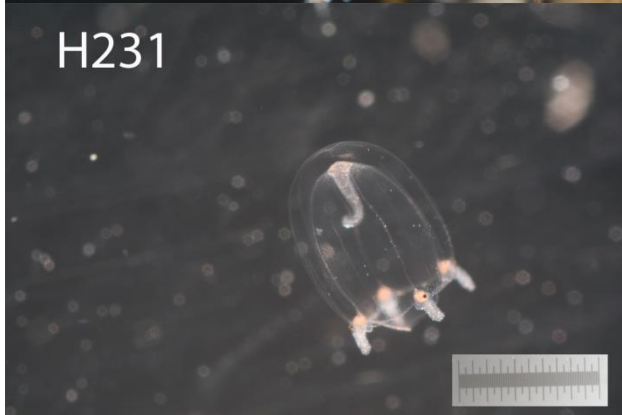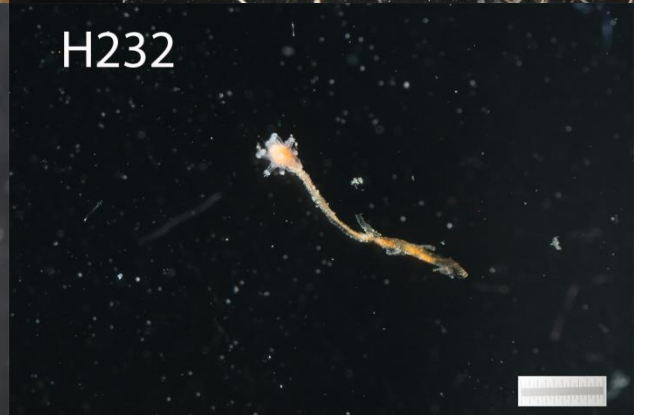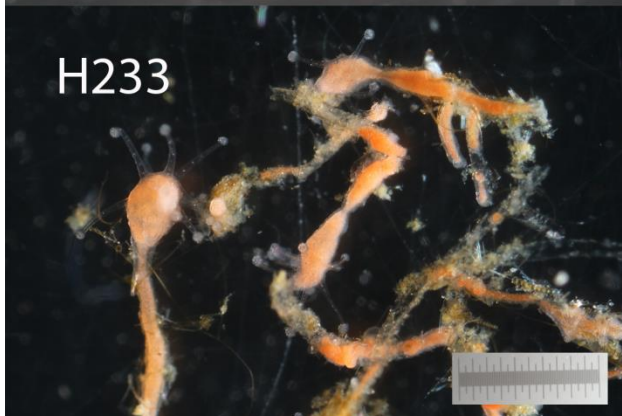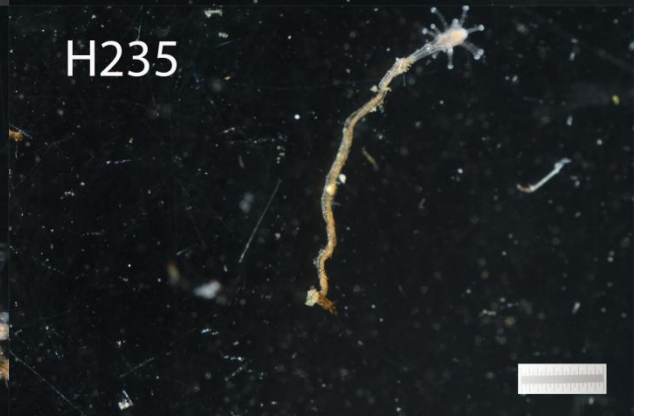

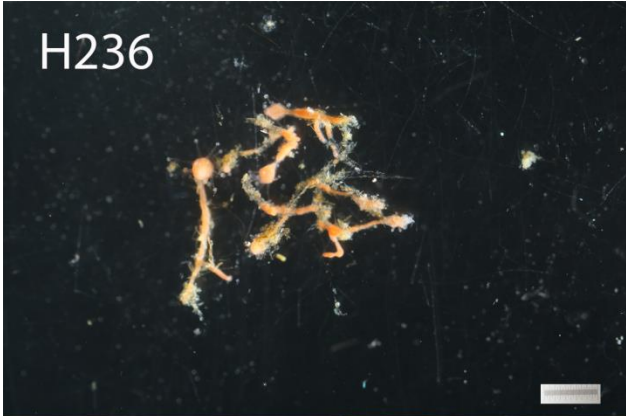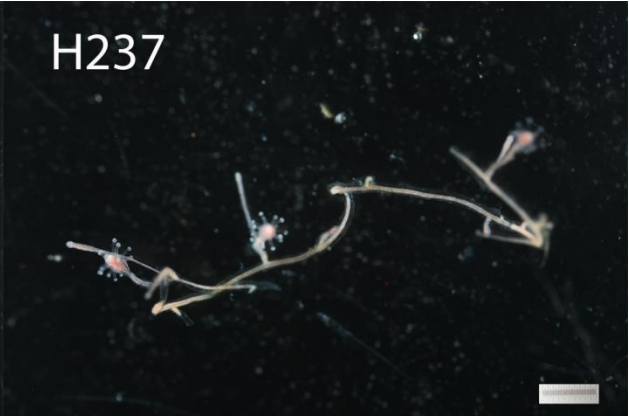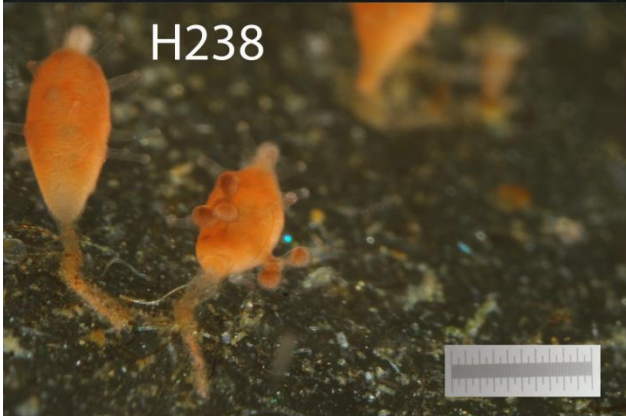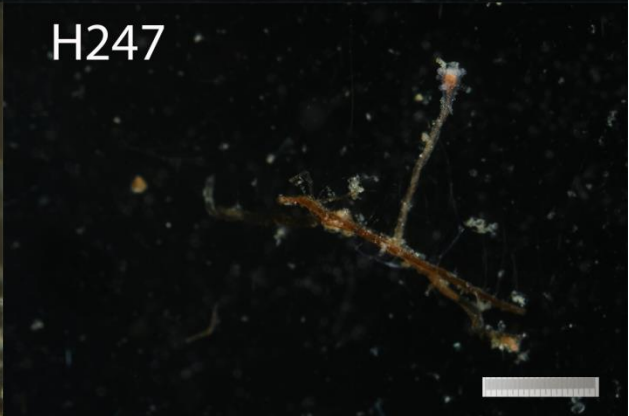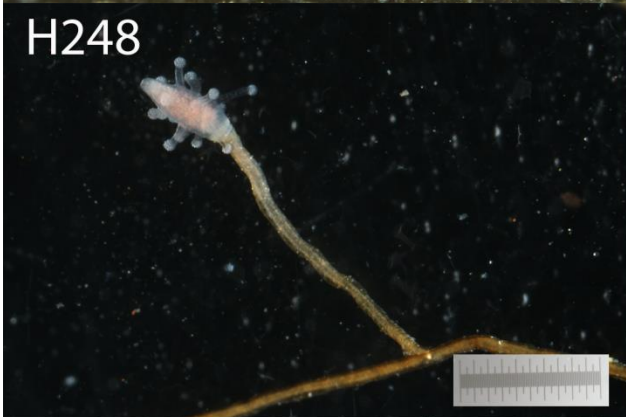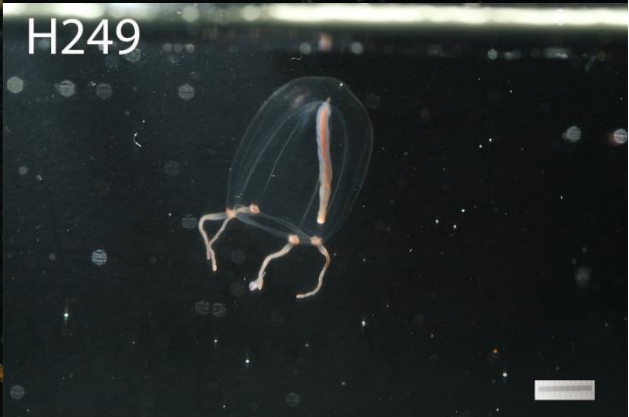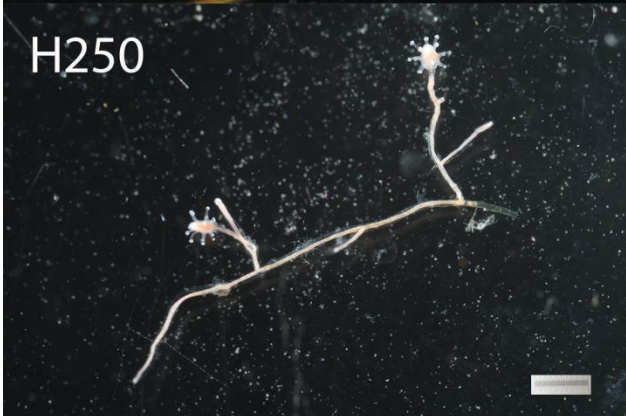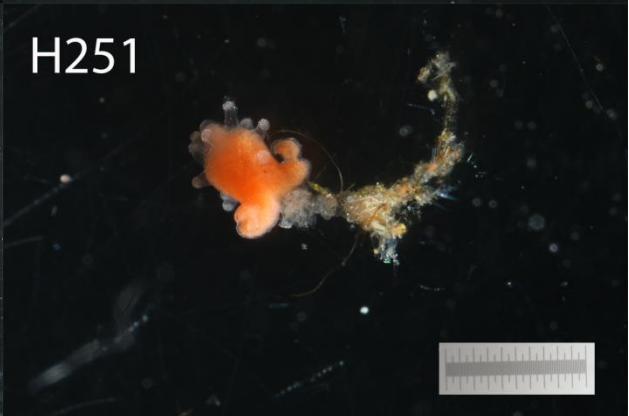

H252

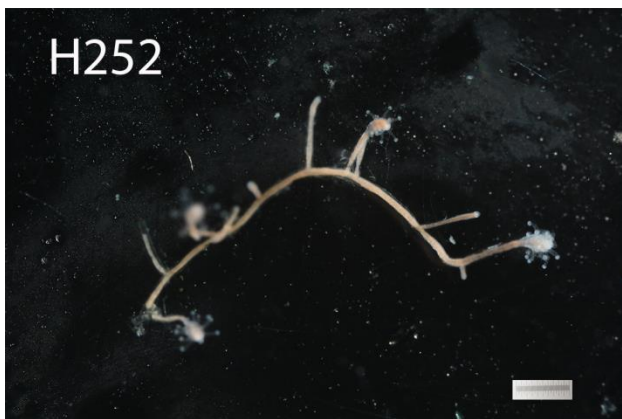

H253

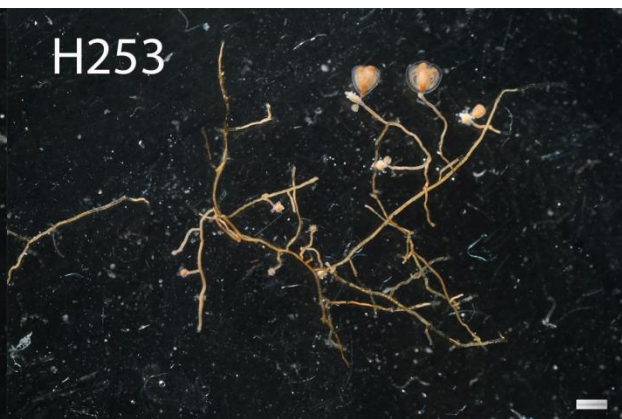

H254

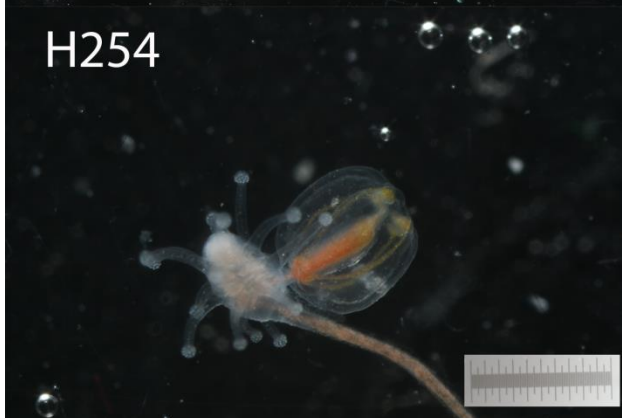

H256

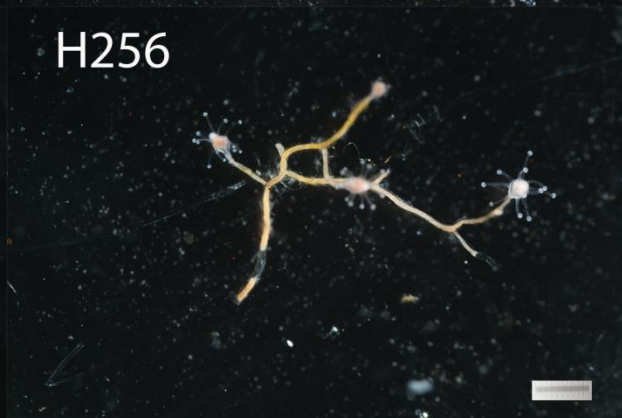

H257

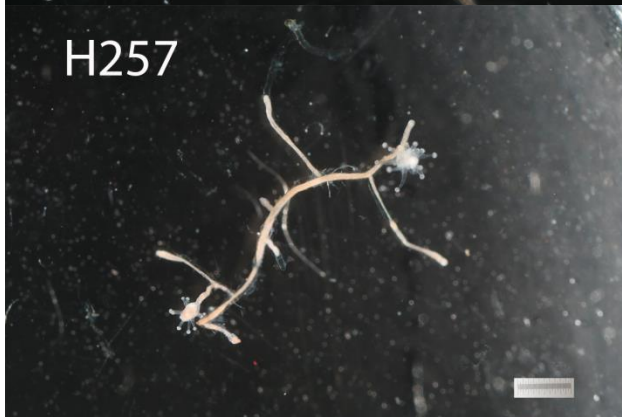

H258

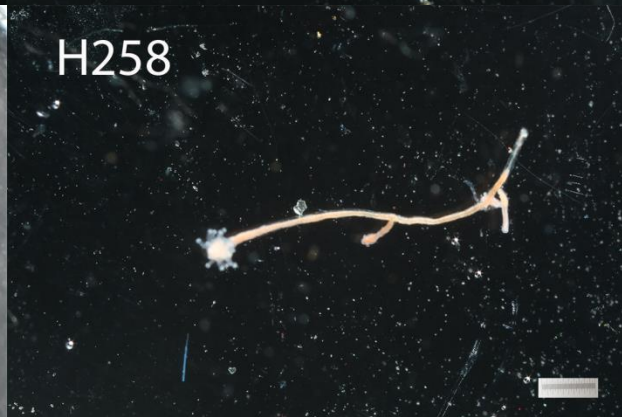

H259

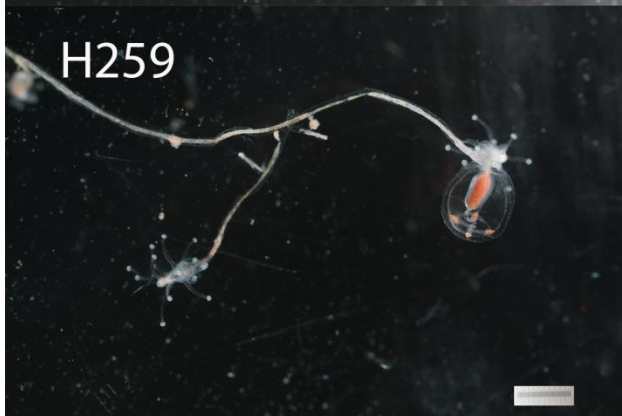

H260

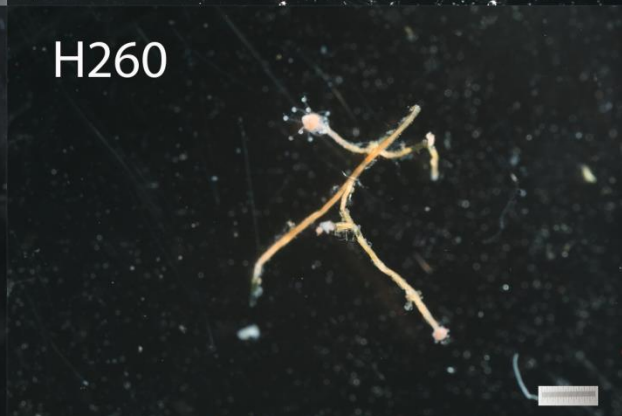

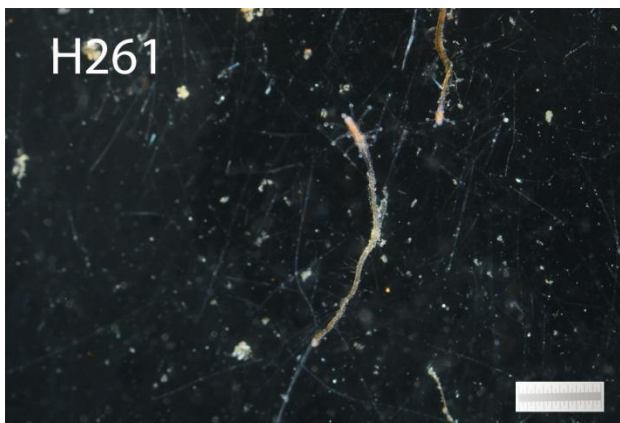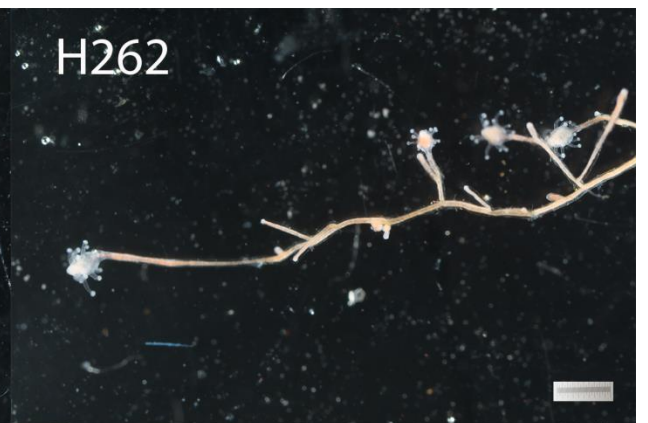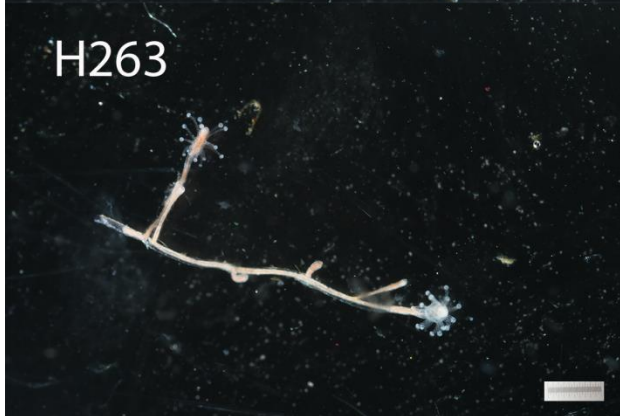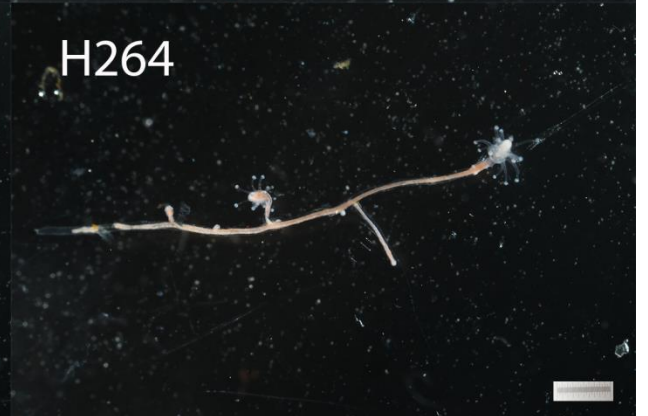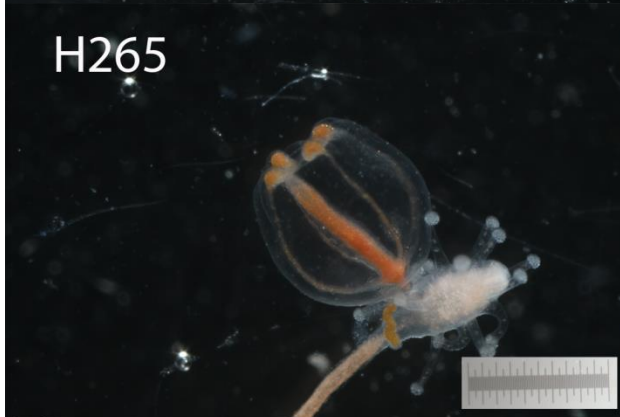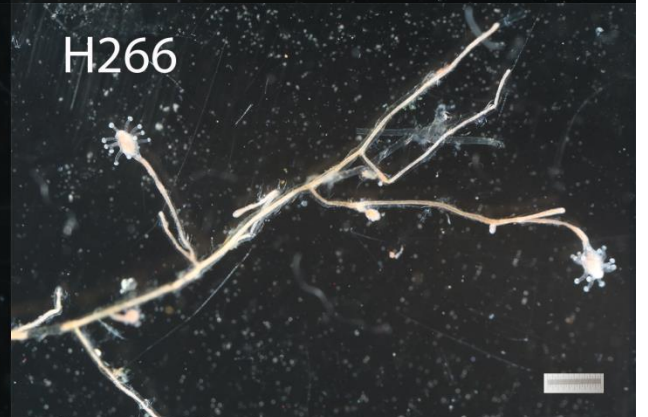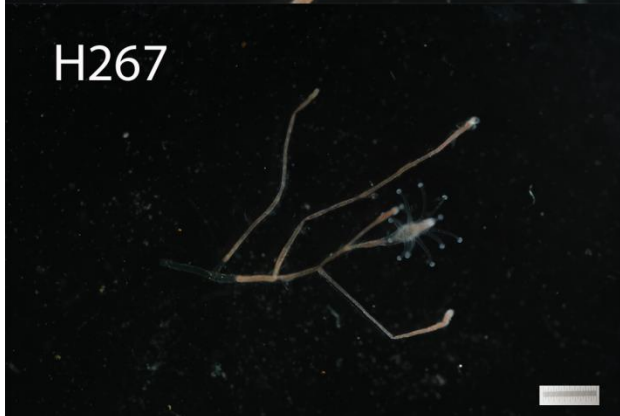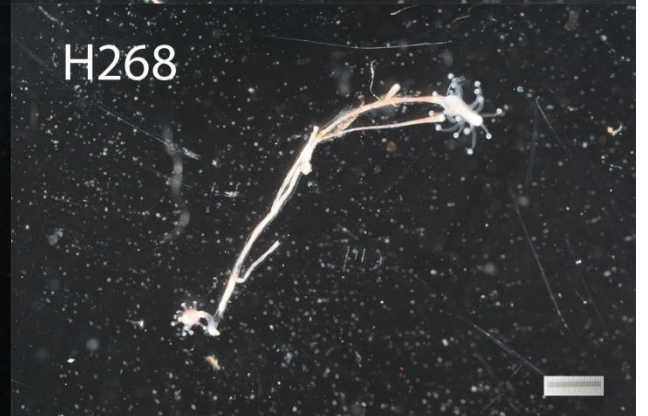

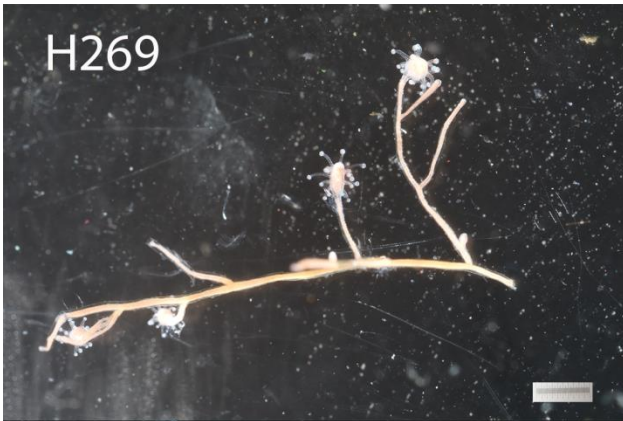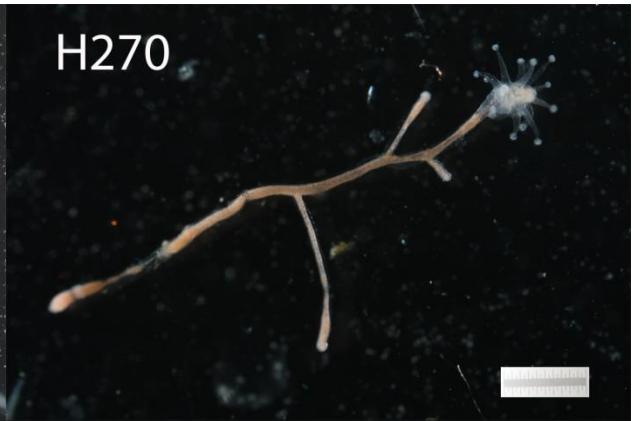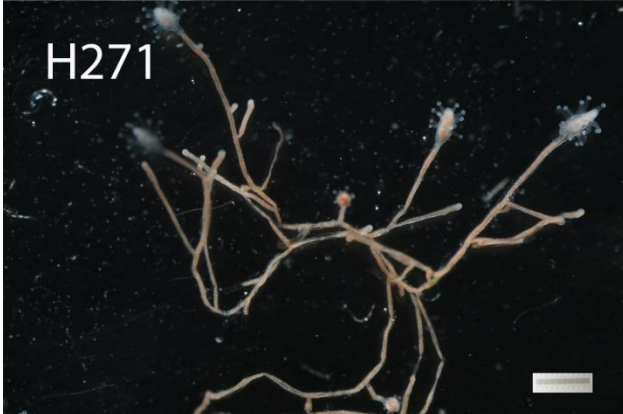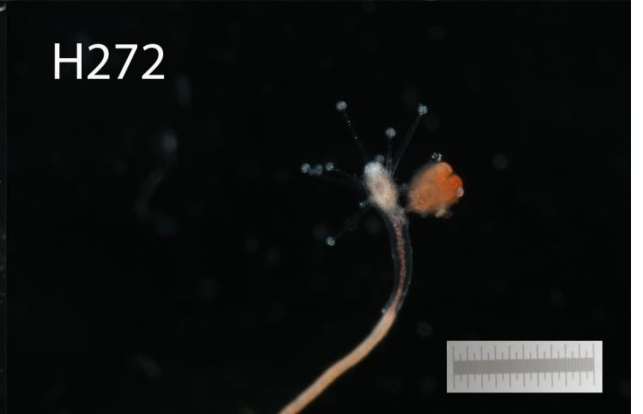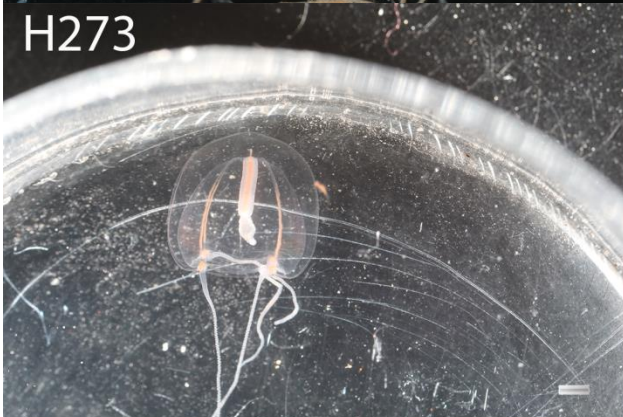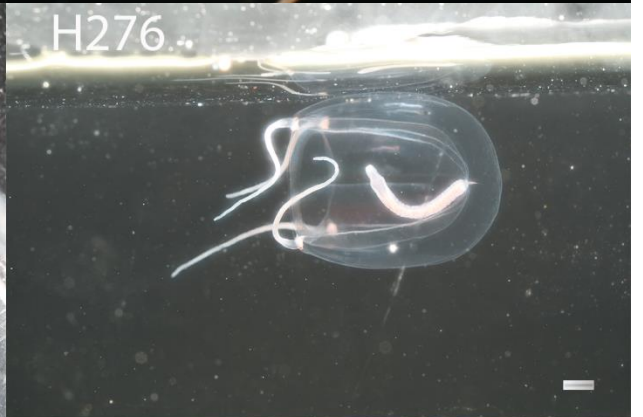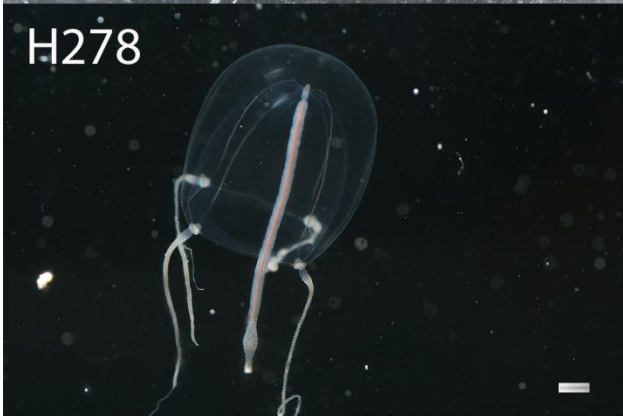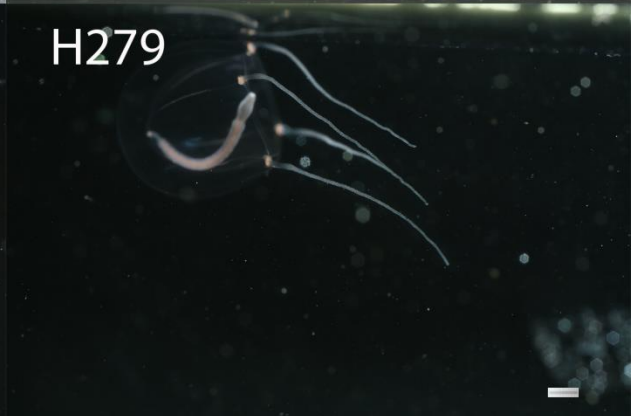

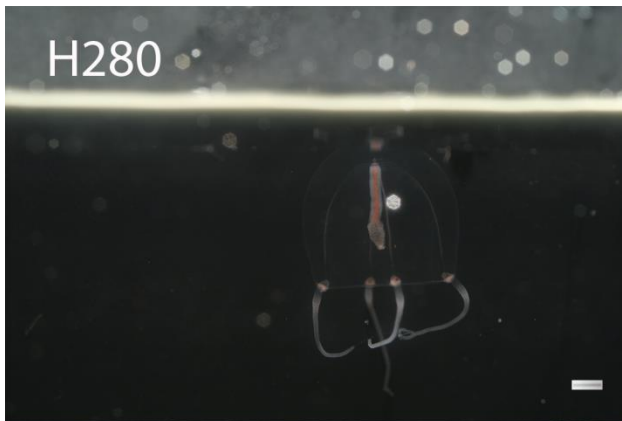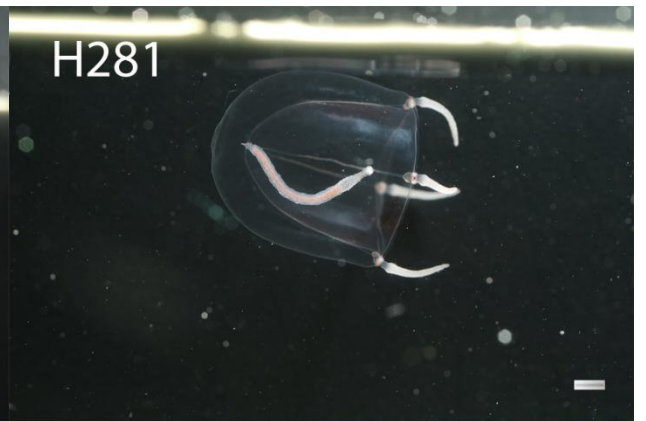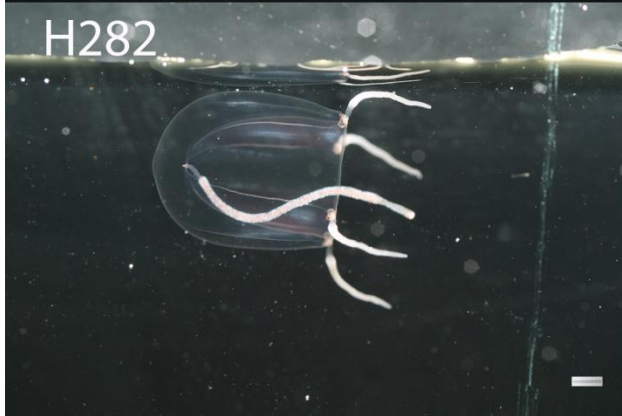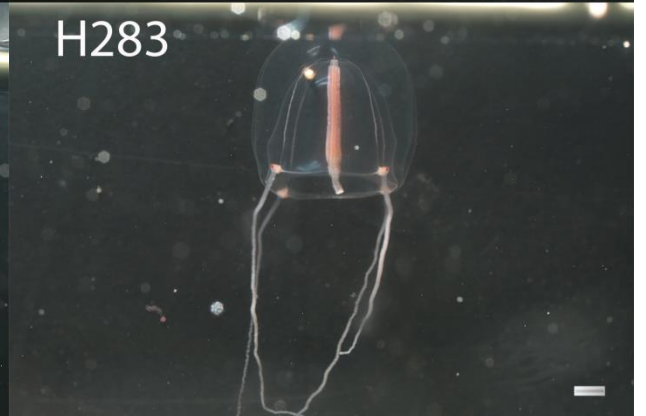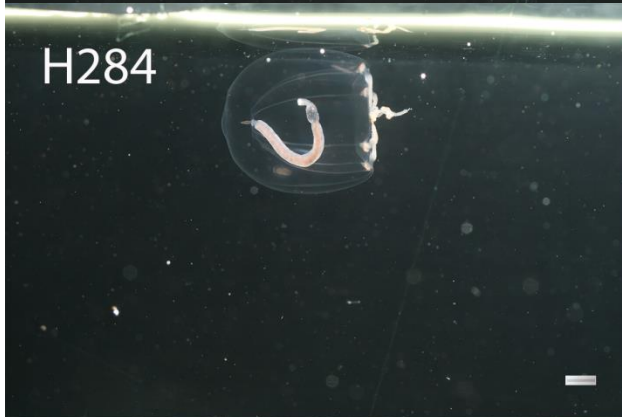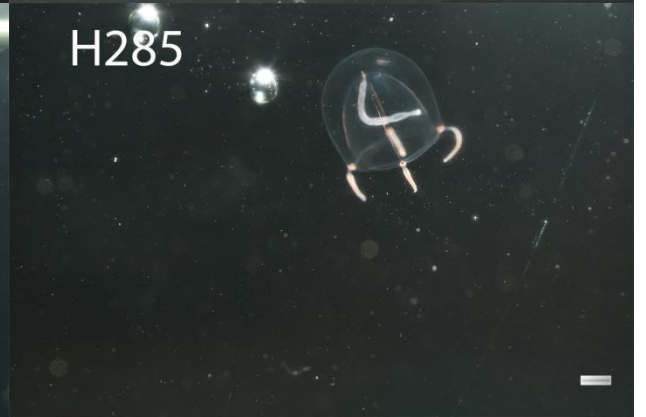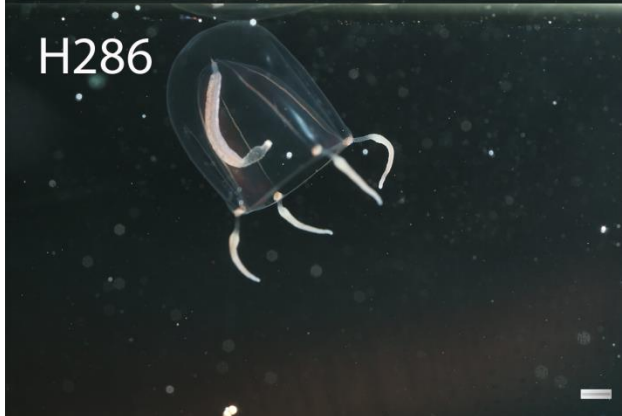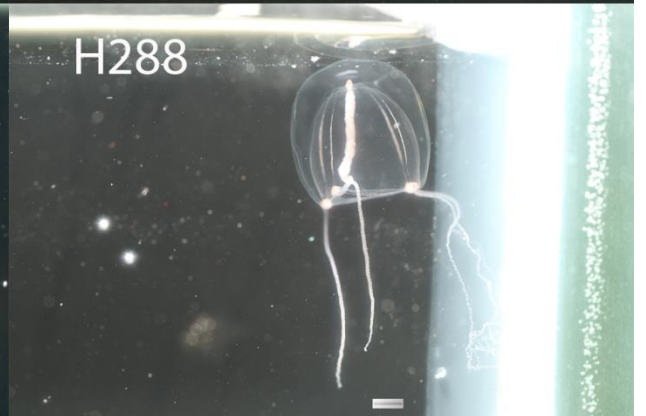

H289

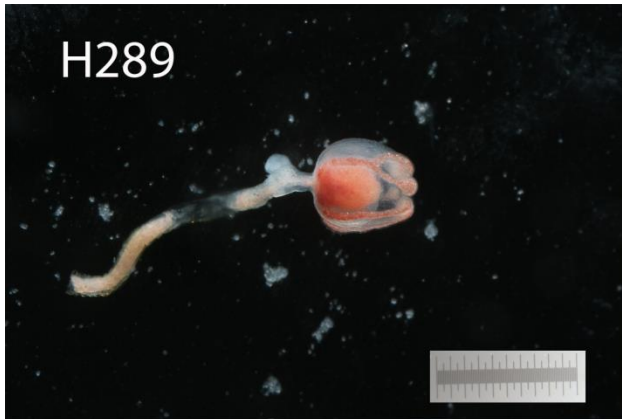

H332

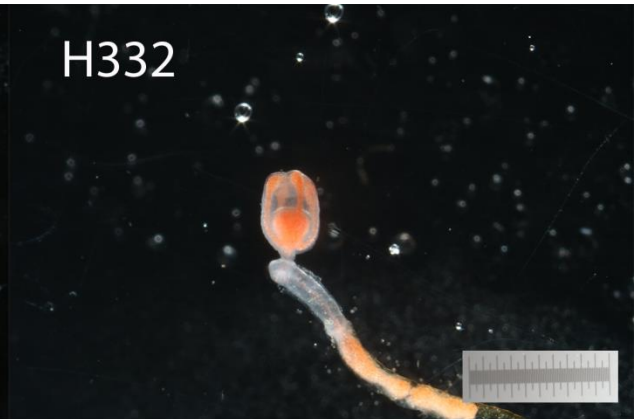

H333

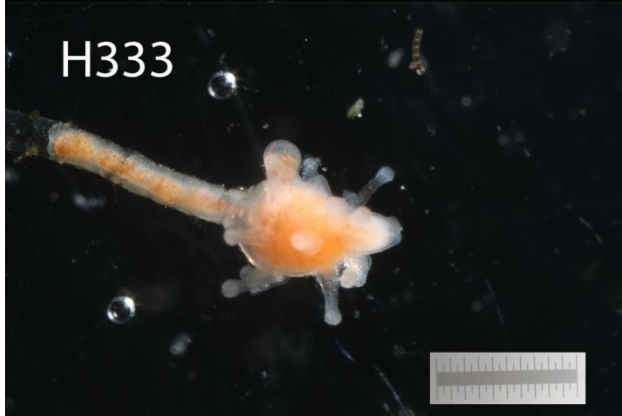

H334

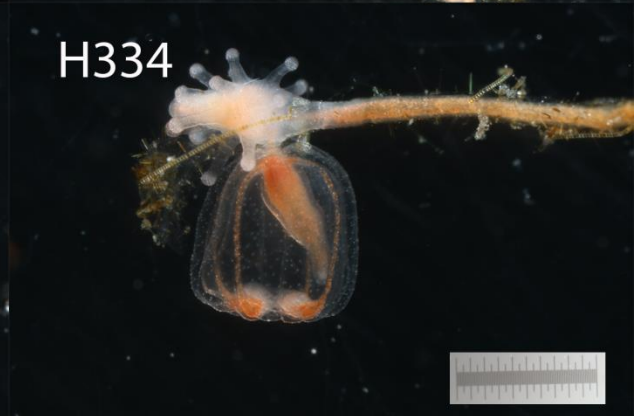

H335

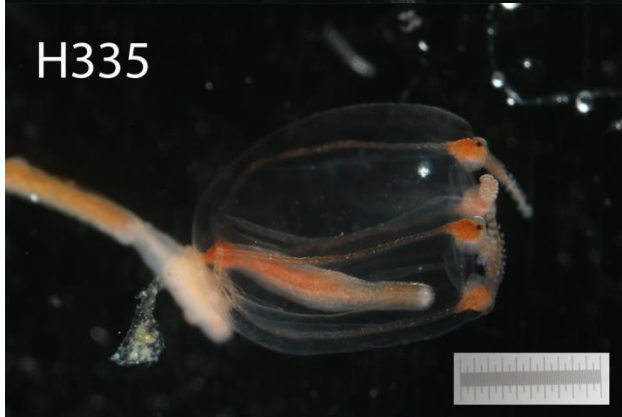

H336

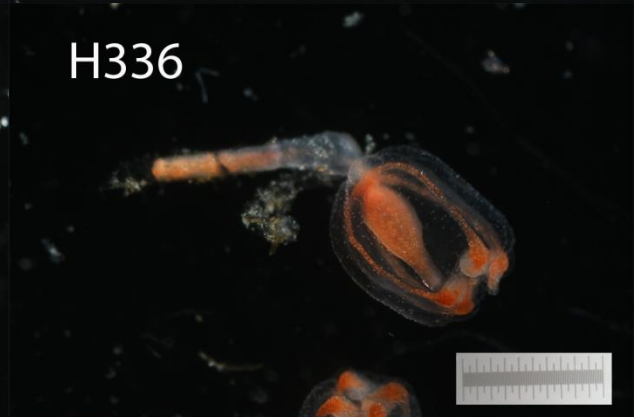

H337

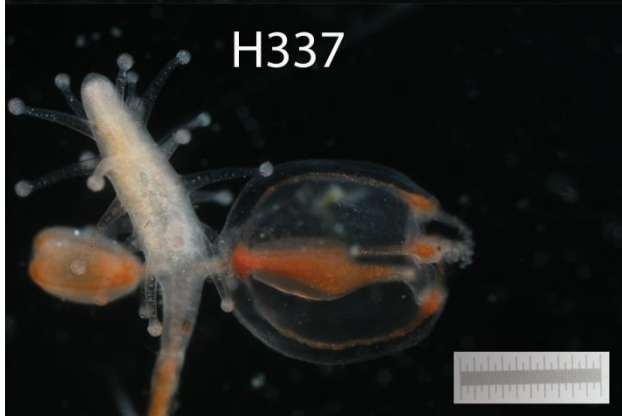

H338

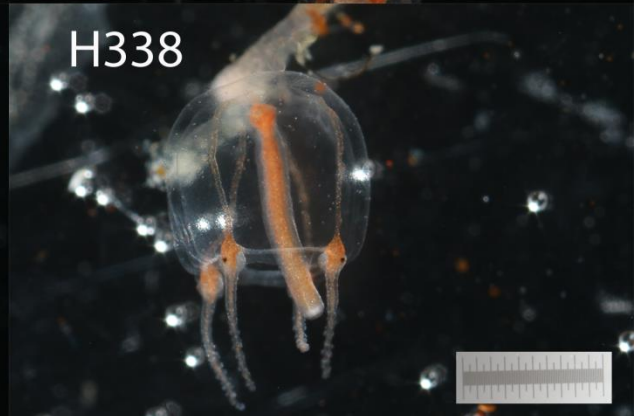

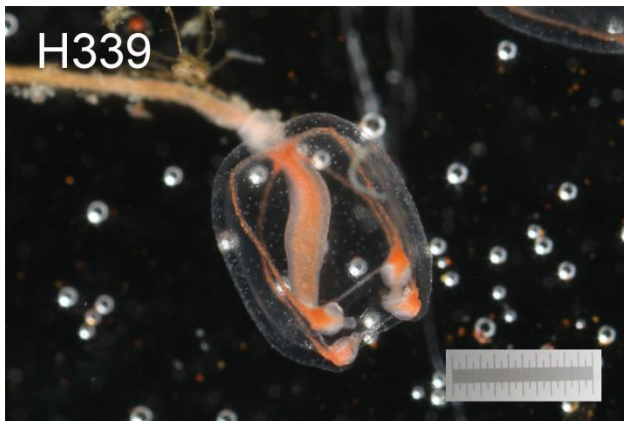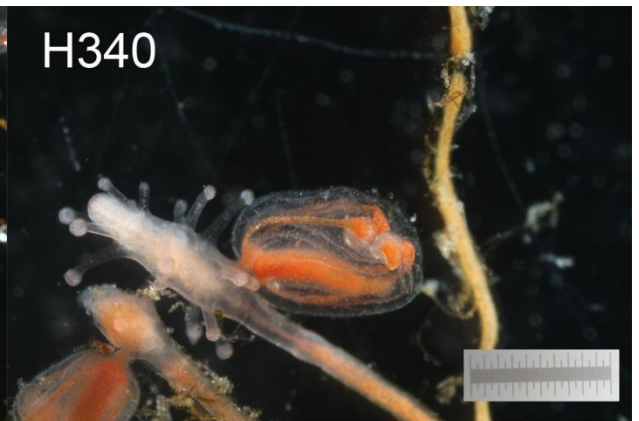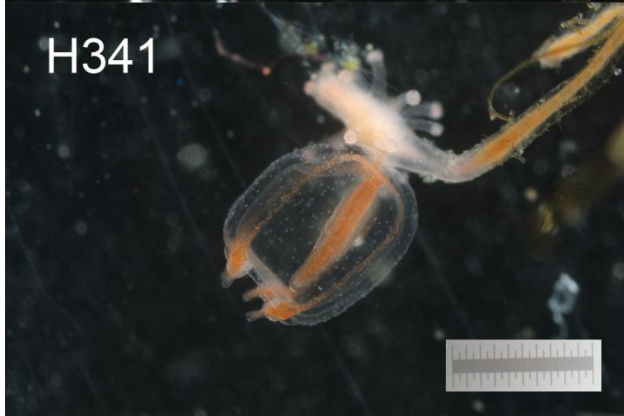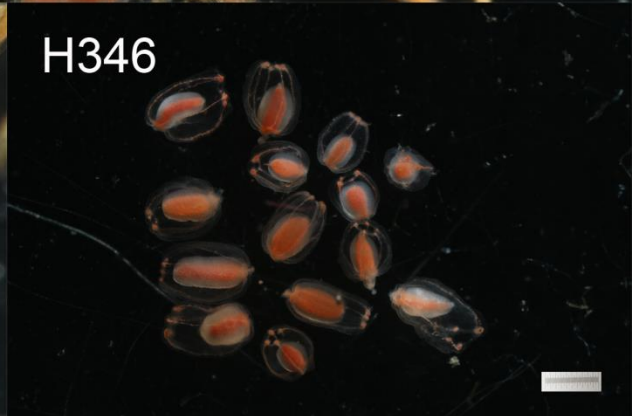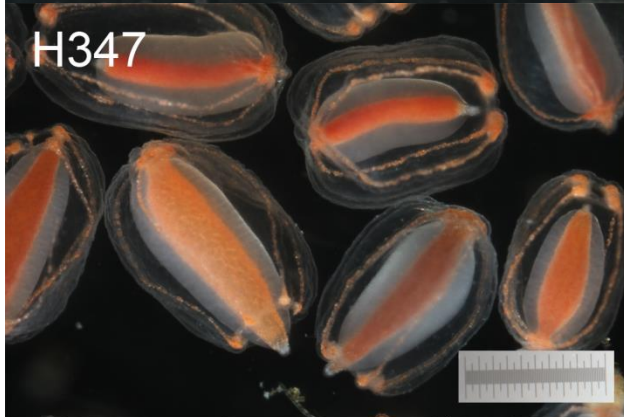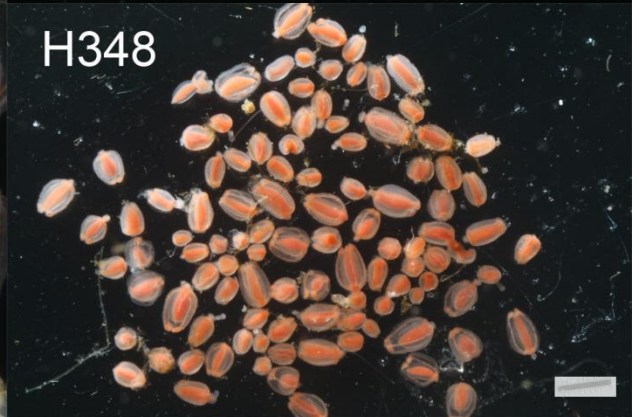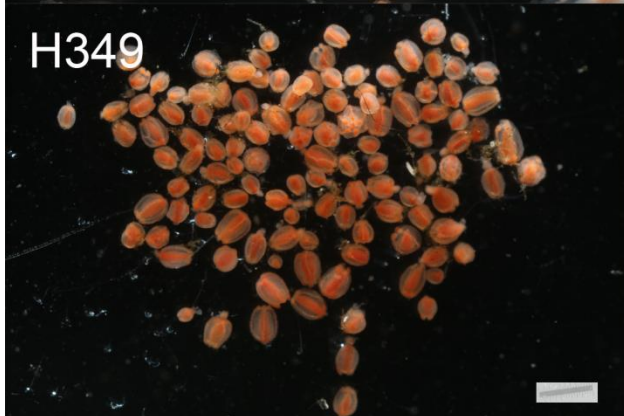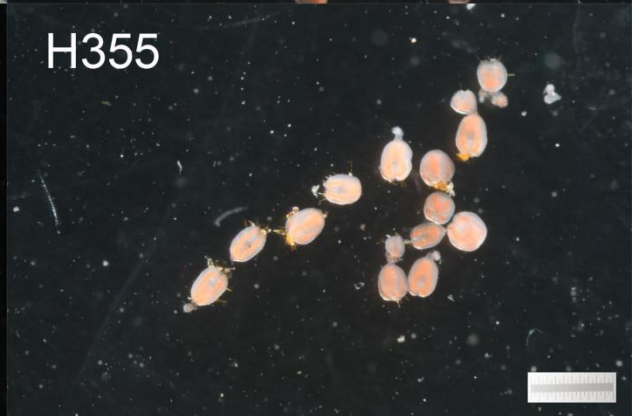

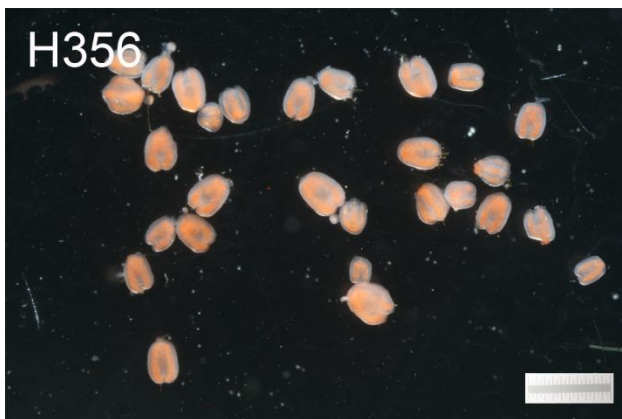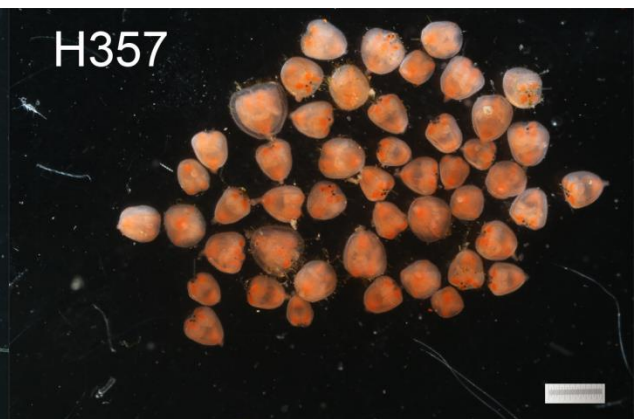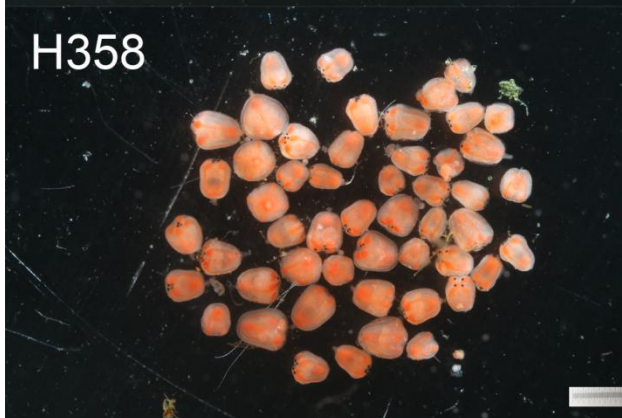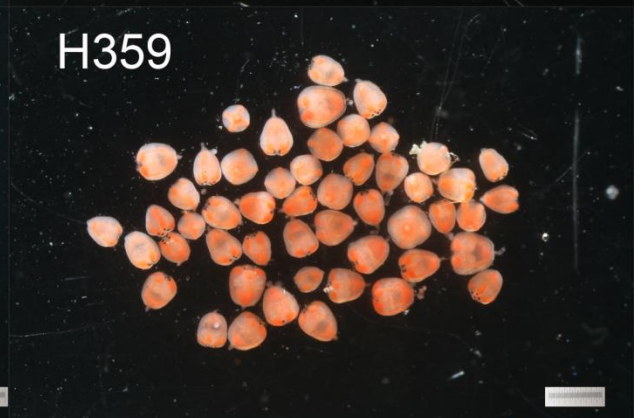

Supplement: Supplementary file 1 [file supplementary]
